# Supplementary material for: Transcriptome Analysis of JA Signal Transduction, Transcription Factors, and Monoterpene Biosynthesis Pathway in Response to Methyl Jasmonate Elicitation in Mentha canadensis L
Source: MDPI journal article supplement (doi:10.3390/ijms19082364), 2018-08-10
Supplement: s1 [file s1]

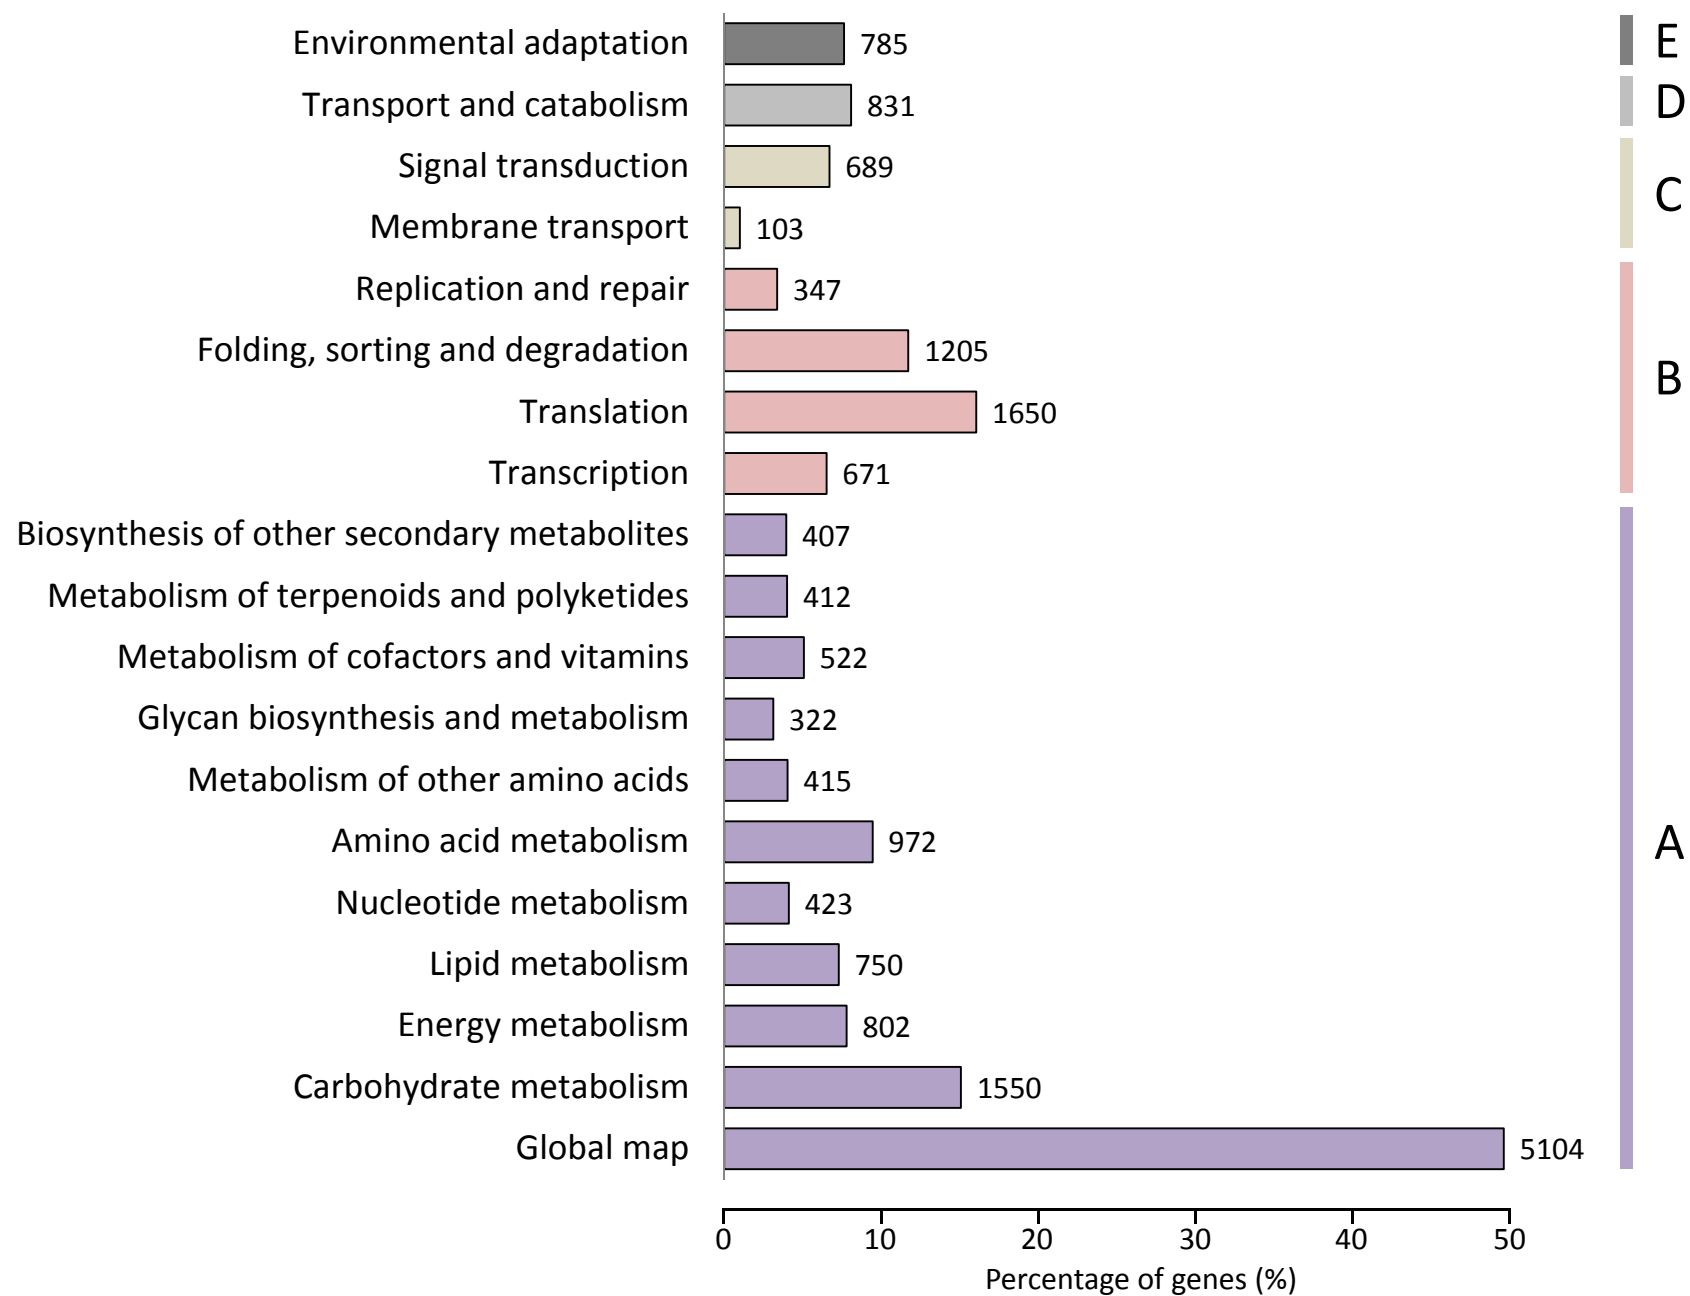

**Supplementary Figure 4 KEGG pathway annotation of assembled unigenes.** A, Metabolism; B, Genetic Information Processing; C, Environmental Information Processing; D, Cellular Processes; E, Organismal Systems.
