# Supplementary material for: Transcriptome Analysis of JA Signal Transduction, Transcription Factors, and Monoterpene Biosynthesis Pathway in Response to Methyl Jasmonate Elicitation in Mentha canadensis L
Source: MDPI journal article supplement (doi:10.3390/ijms19082364), 2018-08-10
Supplement: s1 [file s1]

GPPS-I nucleotide sequences alignment

|                            |                                                                                                                                                                                          |              |
|----------------------------|------------------------------------------------------------------------------------------------------------------------------------------------------------------------------------------|--------------|
| MpGPPS-1<br>Unigene0045757 | ATGAGTCTCTGTTAATCCTGTGCGAAATGGCCTCAGACATCGGCGTTAGATGTTACGGCGGCGCGGAGCGGAGATCCAGATCC<br>ATGAGTCTCTGTTAATCCTGTGCGAAATGGCCTCAGACATCGGCGTTAGATGTTACGGCGGCGCGGAGCGGAGATCCAGATCC               | 90<br>90     |
| MpGPPS-1<br>Unigene0045757 | ACTGTCTTTTCATGTCATCCACTTCGCGTGAATGCGCTTTCTCTCTACTTCTCATCCCGCTCAAGAGTCTCGCCACTTTTTCGGTT<br>ACTGCTTTTCATGTCATCCACTTCGCGCTGAATGCGCTTTCTCTCTACTTCTCAAGCCCTTCAAGAGTCTCGCCACTTTTTCGGTT         | 180<br>180   |
| MpGPPS-1<br>Unigene0045757 | TCTGCGATTTATACCAAGAGCGCAGCGAAATTAGGCTTAAGATCGGCGCTTTCGACTTCGCGCGCGTTCGATTTTCGACGGATACATG<br>TCTGCGATTTATACCAAGAGCGCAGCGAAATTAGGCTTAAGATCGGCGCTTTCGACTTCGCGCGCGTTCGATTTTCGACGGATACATG     | 270<br>270   |
| MpGPPS-1<br>Unigene0045757 | CTCCGGAAGCGCAAAATCCGTGAACAAGGCGTTGGAAGCGCGGTGAGATGAAGGAGCGCGCTGAAGATCCACGAGTCCATGCGGTACTCC<br>CTCCGGAAGCGCAAAATCCGTGAACAAGGCGTTGGAAGCGCGGTGAGATGAAGGAGCGCGCTGAAGATCCACGAGTCCATGCGGTACTCC | 360<br>360   |
| MpGPPS-1<br>Unigene0045757 | CTCTCGCCGCGCGCAAGAGAGTGCCTCATCTGTGCAATCGCGCTCGGAGCTCGTTCGCGCGCGACGAGTCAACGCGGATGCGCGCG<br>CTCTCGCCGCGCGCGCAAGAGAGTGCCTCATCTGTGCAATCGCGCTCGGAGCTCGTTCGCGCGCGACGAGTCAACGCGGATGCGCGCG       | 450<br>450   |
| MpGPPS-1<br>Unigene0045757 | GCCTGCGCGCTCGAGATGATCCACAGATGTGCTGATGACACGACGACCTCCATGCATGGACAACGACGACCTCCGCGCGCGCAAGCCG<br>GCCTGCGCGCTCGAGATGATCCACAGATGTGCTGATGACACGACGACCTCCATGCATGGACAACGACGACCTCCGCGCGCGCAAGCCG     | 540<br>540   |
| MpGPPS-1<br>Unigene0045757 | ACGAACCACTATGCTTCGCGGAGAGCTGGCGGTCTCTCGCGCGGACGCTCTCTCTCTCGCGTTCGAGCAGTGGCGCGCGCGGAC<br>ACGAACCACTATGCTTCGCGGAGAGCTGGCGGTCTCTCGCGCGGACGCTCTCTCTCTCGCGTTCGAGCAGTGGCGCGCGCGGACG            | 630<br>630   |
| MpGPPS-1<br>Unigene0045757 | AAAGCGCGCGCGCGGAGCGGATGCTGAGGCTCTCGCGAGCTGGCTGTCTGATCGGCTCGGAGGCGCTGTGCGCGCGCGAGCTGTG<br>AAGCGCGCGCGCGGAGCGGATGCTGAGGCTCTCGCGAGCTGGCTGTCTGATCGGCTCGGAGGCGCTGTGCGCGCGCGAGCTGTG            | 720<br>720   |
| MpGPPS-1<br>Unigene0045757 | GACATCTGCTCGGAGGGATGGCGGAGGTGCGCTGGACCACTCGAGTTCATCCACCACCACAAGACGCGCGCGCTGCTGACGGCTTCG<br>GACATCTGCTCGGAGGGATGGCGGAGGTGCGCTGGACCACTCGAGTTCATCCACCACCACAAGACGCGCGCGCTGCTGACGGCTTCG       | 810<br>810   |
| MpGPPS-1<br>Unigene0045757 | GTGTTTGGGGGCGATTTTGGCGCGCGGAAGGAGGAGGAGGTGGCGAGCTGAGAAATTCGCGAATTGCATCGGATTGCTGTTTCAG<br>GTGTTTGGGGGCGATTTTGGCGCGCGGAAGGAGGAGGAGGTGGCGAGCTGAGAAATTCGCGAATTGCATCGGATTGCTGTTTCAG           | 900<br>900   |
| MpGPPS-1<br>Unigene0045757 | GTGTTGAGCGTATCTTGAATGTGACGAAATCGTCAAGGAATTGGGGAAGACGCGCGGGAAGGATCTGTGCGCGGAATAACACACATAT<br>GTGTTGAGCGTATCTTGAATGTGACGAAATCGTCAAGGAATTGGGGAAGACGCGCGGGAAGGATCTGTGCGCGGAATAACACACATAT     | 990<br>990   |
| MpGPPS-1<br>Unigene0045757 | CCGAGCTATAGCTGTGGAGAATTCGAAGGAATTCGCGATCGTTGAGGAGGAGGCGGAGCAGCTCTCCATTTCATCTTCAT<br>CCGAGCTATAGCTGTGGAGAATTCGAAGGAATTCGCGATCGTTGAGGAGGAGGCGGAGCAGCTCTCCATTTCATCTTCAT                     | 1080<br>1080 |
| MpGPPS-1<br>Unigene0045757 | AGGGCAGCTCCATTGATGCTCTCGCCAAATTAATGTGCTTAAGGACAAATTG<br>AGGGCAGCTCCATTGATGCTCTCGCCAAATTAATGTGCTTAAGGACAAATTG                                                                             | 1133<br>1133 |

GPPS-I nucleotide sequences alignment

|                            |                                                                                                                                                                                      |            |
|----------------------------|--------------------------------------------------------------------------------------------------------------------------------------------------------------------------------------|------------|
| MpGPPS-1<br>Unigene0045757 | MSLVLNLPVAKWPQTIGVSDVHGGRRRRSRSTLPSHPLRTEMPPSLYFSSLLKAFHFSVSAVYTKESSEIRKDPAPSSPAFDGDM<br>MSLVLNLPVAKWPQTIGVSDVHGGRRRRSRSTLPSHPLRAKLPPSLYFSSLRGSFSPVSAVYTKESSEIRADDPSSPAFDGDM         | 90<br>90   |
| MpGPPS-1<br>Unigene0045757 | LRKAKSVNKALEAAVOMKEPLKIHESMRYSLLAGGKRVRLCIAACELVGGDESTAMPAACAVEMIHTMSLMHDDLPCMDNDLLRRGKP<br>LRKAKSVNKALEAAVOMKEPLKIHESMRYSLLAGGKRVRLCIAACELVGGDESTAMPAACAVEMIHTMSLMHDDLPCMDNDLLRRGKP | 180<br>180 |
| MpGPPS-1<br>Unigene0045757 | TNHRVFGESAVLAGDALLSPAFPHVAATRGAFTERIVRVLGELAVSIGSEGLVAGQVVDLCSEGMAEVGLSHLRIHHHKTAALLQGS<br>TNHRVFGESAVLAGDALLSPAFPHVAATRGAFTERIVRVLGELAVSIGSEGLVAGQVVDLCSEGMAEVGLSHLRIHHHKTAALLQGS   | 270<br>270 |
| MpGPPS-1<br>Unigene0045757 | VVLGAILGGGEEFVAURLKRFANCIGLLPQVDDILDVTKSSKELGKTAGKDLVADKTTYPKLIGVEKSKEPADRIKREANBQLLHPFH<br>VVLGAILGGGEEFVAURLKRFANCIGLLPQVDDILDVTKSSKELGKTAGKDLVADKTTYPKLIGVEKSKEPADRIKREANBQLLHPFH | 360<br>360 |
| MpGPPS-1<br>Unigene0045757 | RAAPLIALANYIAYRD<br>RAAPLIALANYIAYRD                                                                                                                                                 | 376<br>376 |

GPPS-s nucleotide sequences alignment

|                            |                                                                                                                                                                                        |            |
|----------------------------|----------------------------------------------------------------------------------------------------------------------------------------------------------------------------------------|------------|
| MpGPPS-s<br>Unigene0038587 | ATGGCCATTAACTCTCCCATATCAACTCCAAAACATGTTTCCCTCTCAAAAACAGATCTGATCTCAGCCGTTCTTCTTCCGCGCGTTGC<br>ATGGCCATTAACTCTCCCATATCAACTCCAAAACATGTTTCCCTCTCAAAAACAGATCTGATCTCAGCCGTTCTTCTTCCGCGCGTTGC | 90<br>90   |
| MpGPPS-s<br>Unigene0038587 | ATGCCAACTGCCGCGCTGCCGCTTCCCCACTATGCCACGCGCCCAAAAGTCAGCCGTATGGGCGCCCATCGCGCCGACATAGAG<br>ATGCCAACTGCCGCGCTGCCGCTTCCCCACTATGCCACGCGCCCAAAAGTCAGCCGTATGGGCGCCCATCGCGCGCCGACATAGAG         | 180<br>180 |
| MpGPPS-s<br>Unigene0038587 | AGATACTGAAGAAATCCATCGAATAAGSCCGCCGAGACAGTTTTCGGGCCCATGCACCACCTCACCTTCGCCGCCCCAGCCACCGCC<br>AGATACTGAAGAAATCCATCGAATAAGSCCGCCGAGACAGTTTTCGGGCCCATGCACCACCTCACCTTCGCCGCCCCAGCCACCGCC     | 270<br>270 |
| MpGPPS-s<br>Unigene0038587 | GCTCTCCCTCATATGCTTGGCGGGAGTGGAGCTCGTCGGCGCGGACCGAAGCCATGGCAGCCGCGGGCGATCCATCTCGTCCAC<br>GCTCTCCCTCATATGCTTGGCGGGAGTGGAGCTCGTCGGCGCGGACCGAAGCCATGGCAGCCGCGGGCGATCCATCTCGTCCAC           | 360<br>360 |
| MpGPPS-s<br>Unigene0038587 | GCGGCAGCCTACGTCCACGCACTCCTCCCTTAACCGACGGGTGGAGGCCATCCAAAGCCCGCAATCCAGCACAAGTACGGCCCGAAC<br>GCGGCAGCCTACGTCCACGCACTCCTCCCTTAACCGACGGGTGGAGGCCATCCAAAGCCCGCAATCCAGCACAAGTACGGCCCGAAC     | 450<br>450 |
| MpGPPS-s<br>Unigene0038587 | GTGAGCTCCTCACCGGAGACGGGATTGTCCCGTTCGGGTTTGAGTTGCTGGCCGGTCAGTGGACCCGGCCCGAACAGACGACCCGGAT<br>GTGAGCTCCTCACCGGAGACGGGATTGTCCCGTTCGGGTTTGAGTTGCTGGCCGGTCAGTGGACCCGGCCCGAACAGACGACCCGGAT   | 540<br>540 |
| MpGPPS-s<br>Unigene0038587 | AGGATCTGAGAGTTATAATAGAGATCAGTCGGGCCCGCGCGCCCGAGGGAAATGATAAGCGGGTGCATAGGGAAGAAATTTGTTGAT<br>AGGATCTGAGAGTTATAATAGAGATCAGTCGGGCCCGCGCGCCCGAGGGAAATGATAAGCGGGTGCATAGGGAAGAAATTTGTTGAT     | 630<br>630 |
| MpGPPS-s<br>Unigene0038587 | GGAATACGAGTTTAGACTTCATTGAATATGTGTCAAGAAAAAATACGGCGAGATGCATGCTTGGCGCGCGGCTTGTGAGCCATATTG<br>GGAATACGAGTTTAGACTTCATTGAATATGTGTCAAGAAAAAATACGGCGAGATGCATGCTTGGCGCGCGGCTTGTGAGCCATATTG     | 720<br>720 |
| MpGPPS-s<br>Unigene0038587 | GCGCGCGCAACCGAGCAGGAGATTCAAGAGCTGAGGAATTTGGGGCTTTATCAAGGAACCTCAGAGGAATGATGGAATGAAAAATTC<br>GCGCGCGCAACCGAGCAGGAGATTCAAGAGCTGAGGAATTTGGGGCTTTATCAAGGAACCTCAGAGGAATGATGGAATGAAAAATTC     | 810<br>810 |
| MpGPPS-s<br>Unigene0038587 | CATGAATTAATTGATGAGAATATAATTGAAAAATTGAAAGAATTGGCTCTCGAGGAGTTGGGAGGCTTCACGGGAAGAACGCTGAGCTG<br>CATGAATTAATTGATGAGAATATAATTGAAAAATTGAAAGAATTGGCTCTCGAGGAGTTGGGAGGCTTCACGGGAAGAACGCTGAGCTG | 900<br>900 |
| MpGPPS-s<br>Unigene0038587 | ATGTCGAGCCTTGTAGCCGAGCCGAGCCTTTACCGGCTTA<br>ATGTCGAGCCTTGTAGCCGAGCCGAGCCTTTACCGGCTTA                                                                                                   | 941<br>941 |

GPPS-s amino acid sequences alignment

|                            |                                                                                                                                                                                            |            |
|----------------------------|--------------------------------------------------------------------------------------------------------------------------------------------------------------------------------------------|------------|
| MpGPPS-s<br>Unigene0038587 | MAINLSHINSKTCFPLKTRSDLRSSSSRCMPTAAAFPTTATAAOSOPYWAAISADIDRYLKKSITRPPETVFGPMHHLTFAAPATA<br>MAINLSHINSKTCFPLKTRSDLRSSSSRCMPTAAAFPTTATAAOSOPYWAAISADIDRYLKKSITRPPETVFGPMHHLTFAAPATA           | 90<br>90   |
| MpGPPS-s<br>Unigene0038587 | ASNLCLAAACELVGGDRSQAMAAAAATHLVHAAAYVHEHLPLTDGSRFVSKPAIQHKYGPNVELLTGDGIVPFGFELLAGSVDPARTDDPD<br>ASNLCLAAACELVGGDRSQAMAAAAATHLVHAAAYVHEHLPLTDGSRFVSKPAIQHKYGPNVELLTGDGIVPFGFELLAGSVDPARTDDPD | 180<br>180 |
| MpGPPS-s<br>Unigene0038587 | RILRVIIETSRAGGPFGMISGLHREBEIVDGTSLDFIEYVCKKKYGEHMHACGAACGAILGGABEEIQKLRFNGLYQGTLRGMMEMKNS<br>RILRVIIETSRAGGPFGMISGLHREBEIVDGTSLDFIEYVCKKKYGEHMHACGAACGAILGGABEEIQKLRFNGLYQGTLRGMMEMKNS     | 270<br>270 |
| MpGPPS-s<br>Unigene0038587 | HEIDENIIQKLKELALEELGGFHGKNAELMSSILVAEPSLYV<br>HEIDENIIQKLKELALEELGGFHGKNAELMSSILVAEPSLYV                                                                                                   | 312<br>312 |

## LS nucleotide sequences alignment

|                        |                                                                                                                                                                                              |              |
|------------------------|----------------------------------------------------------------------------------------------------------------------------------------------------------------------------------------------|--------------|
| MpLS<br>Unigene0018537 | ATGGCTCTCAGTGTTTAGTGTGCAATGCAAAATCGCAATTCCTACGACGCTAACGACCTATCTTCAACCCCTCACACTTGAATTCCTCT<br>ATGGCTCTCAGTGTTTAGTGTGCAATGCAAAATCGCAATTCCTACGACGCTAACGACCTATCTTCAACCCCTCACACTTGAATTCCTCT       | 90<br>90     |
| MpLS<br>Unigene0018537 | CCTAAATTGTCTCTTAACACTAAGGGTACTAGTGGCTCTCGCTCCGTGTGTCTTCTGCTCCTCGCAACTACTACCGAAGAGCGATCC<br>CCTAAATTGTCTCTTAACACTAAGGGTACTAGTGGCTCTCGCTCCGTGTGTCTTCTGCTCCTCGCAACTACTACCGAAGAGCGATCC           | 180<br>180   |
| MpLS<br>Unigene0018537 | GGAACCTACAAACCTTCTCGTGGGATGTGACTTTATCCAAACGCTCCAGTGATTATAGGACGAGAGCATGCGAGAAGGGCTTCT<br>GGAACCTACAAACCTTCTCGTGGGATGTGACTTTATCCAAACGCTCCAGTGATTATAGGACGAGAGCATGCGAGAAGGGCTTCT                 | 270<br>270   |
| MpLS<br>Unigene0018537 | GAGCTGGTCACTTTGGTGAAGATGGAATTGGAGAAAGAAACGATCAAAATCGACAGCTTGAATTGATTGATGACTTGCAGAGGATGGGG<br>GAGCTGGTCACTTTGGTGAAGATGGAATTGGAGAAAGAAACGATCAAAATCGACAGCTTGAATTGATTGATGACTTGCAGAGGATGGGG       | 360<br>360   |
| MpLS<br>Unigene0018537 | CTGTCCGATCATTTCCAGAAACGAGTTCAAAGAAATCTTGTCTCTGTATATCTCGACCATCTCTATTACAGAAATCTCTGATCCAAAGAA<br>CTGTCCGATCATTTCCAGAAACGAGTTCAAAGAAATCTTGTCTCTGTATATCTCGACCATCTCTATTACAGAAATCTCTGATCCAAAGAA     | 450<br>450   |
| MpLS<br>Unigene0018537 | GAAAGGAGTCTATACTCCACATCTCTGCATTTAGGCTCCTTCGAGAACATGGGTTTCAAGTTGCTCAAGAGGATTTCCAGAGTTTCAAG<br>GAAAGGAGTCTATACTCCACATCTCTGCATTTAGGCTCCTTCGAGAACATGGGTTTCAAGTTGCTCAAGAGGATTTCCAGAGTTTCAAG       | 540<br>540   |
| MpLS<br>Unigene0018537 | AACGAGGAGGGTGAGTTCAAAAGAAAGCCTTAGCGACGACACGACGAGGATGTGTCAACTGTACGAAAGCTTTCTTTCTGTGTACGGAAGGC<br>AACGAGGAGGGTGAGTTCAAAAGAAAGCCTTAGCGACGACACGACGAGGATGTGTCAACTGTACGAAAGCTTTCTTTCTGTGTACGGAAGGC | 630<br>627   |
| MpLS<br>Unigene0018537 | GAAACGACGCTCGACTCAGCGAGAGAAATTCGCCACAAATTTCTCGAAGAAAGAGTGAATGAGGGTGGTGGTGTATGAAACCTTTTAAACA<br>GAAACGACGCTCGACTCAGCGAGAGAAATTCGCCACAAATTTCTCGAAGAAAGAGTGAATGAGGGTGGTGGTGTATGAAACCTTTTAAACA   | 720<br>717   |
| MpLS<br>Unigene0018537 | AGAATCGCATATCTTTTAGAATAATCCCACTTCATTGGAGAGATTAAAGGCCAAATGCACCTGTGTGGATTCATTCGTATAGGAAGAGGCC<br>AGAATCGCATATCTTTTAGAATAATCCCACTTCATTGGAGAGATTAAAGGCCAAATGCACCTGTGTGGATTCATTCGTATAGGAAGAGGCC   | 810<br>807   |
| MpLS<br>Unigene0018537 | AACATGAATCCAGTAGTGTGGACCTTGCCATACTCGACTTAAATATTGTTCAAGCTCATTTTCAACAGAACTCAAAGAAATCTTCTCGG<br>AACATGAATCCAGTAGTGTGGACCTTGCCATACTCGACTTAAATATTGTTCAAGCTCATTTTCAACAGAACTCAAAGAAATCTTCTCGG       | 900<br>897   |
| MpLS<br>Unigene0018537 | TGGTGGAGAAATACTGGGTTTGTGTGAGAAGCTGCCCTTCGCAAGGGTAGACTGTGTGAATGCTACTTTTGGAAATCTGGGATCATCGAG<br>TGGTGGAGAAATACTGGGTTTGTGTGAGAAGCTGCCCTTCGCAAGGGTAGACTGTGTGAATGCTACTTTTGGAAATCTGGGATCATCGAG     | 990<br>987   |
| MpLS<br>Unigene0018537 | CCAGCTCAGCATGCAAGTGCAGAGTAATGATGGGCAAGTCAACGCTCTGATTACGGTGATAGATGATATTTATGATGTCTATGTGTACC<br>CCAGCTCAGCATGCAAGTGCAGAGTAATGATGGGCAAGTCAACGCTCTGATTACGGTGATAGATGATATTTATGATGTCTATGTGTACC       | 1080<br>1077 |
| MpLS<br>Unigene0018537 | TTAGAAAGAACTGGAACAATTTCACAGACCTCATTOGGAGATGGGATATAGACTCAATCGACCAACTTCCCGATTACATGCAACTGTGCTTT<br>TTAGAAAGAACTGGAACAATTTCACAGACCTCATTOGGAGATGGGATATAGACTCAATCGACCAACTTCCCGATTACATGCAACTGTGCTTT | 1170<br>1167 |
| MpLS<br>Unigene0018537 | CTCGCACTCAACAACCTTCGTGATGTACATCTGACGATGTTATGAAGAGAAAGGCGTCAACGTTATACCTTACTCTCCGCAATCGTGG<br>CTCGCACTCAACAACCTTCGTGATGTACATCTGACGATGTTATGAAGAGAAAGGCGTCAACGTTATACCTTACTCTCCGCAATCGTGG         | 1260<br>1257 |
| MpLS<br>Unigene0018537 | GTTGATTTGGCGGATAAGTAAATGTGTAGAGGACCGTGTCTTCAAGGCGCACAAACCAAGTTTGGAGAGTATTTGGAAGAACTCATGG<br>GTTGATTTGGCGGATAAGTAAATGTGTAGAGGACCGTGTCTTCAAGGCGCACAAACCAAGTTTGGAGAGTATTTGGAAGAACTCATGG         | 1350<br>1347 |
| MpLS<br>Unigene0018537 | ATGTGATTAAGTGGGCGCTGATGTTGACACATATTTTCGAGTAAGGATTCATTCACAAAGAGAGAGTGTGACAGTTTGTACAAAG<br>CATGTGATTAAGTGGGCGCTGATGTTGACACATATTTTCGAGTAAGGATTCATTCACAAAGAGAGAGTGTGACAGTTTGTACAAAG              | 1440<br>1437 |
| MpLS<br>Unigene0018537 | TACACAGATTTAGTTCGTTGGTCACTCTCTGTTTTCGCACTTGTCTGATGATTGGGAACCTCGSTGGAAGAGGTGAGCAGAGGCGATG<br>TACACAGATTTAGTTCGTTGGTCACTCTCTGTTTTCGCACTTGTCTGATGATTGGGAACCTCGSTGGAAGAGGTGAGCAGAGGCGATG         | 1530<br>1527 |
| MpLS<br>Unigene0018537 | CCGAAATCACTTCAGTGTACATGATGACTACAATGCTTCGGAGGCGGAGGCGCGAAGCACGTGAAATGGCTGATACCGAGAGTGTGG<br>CCGAAATCACTTCAGTGTACATGATGACTACAATGCTTCGGAGGCGGAGGCGCGAAGCACGTGAAATGGCTGATACCGAGAGTGTGG           | 1620<br>1617 |
| MpLS<br>Unigene0018537 | AAGAAGATGAATGCAAGAGGTTGCGAAGGATTCTCCATTGGCAAGATTTTATAGGATGTGCAGTTGATTTGGAAGGATGGCGCAG<br>AAGAAGATGAATGCAAGAGGTTGCGAAGGATTCTCCATTGGCAAGATTTTATAGGATGTGCAGTTGATTTGGAAGGATGGCGCAG               | 1710<br>1707 |
| MpLS<br>Unigene0018537 | TTGATGTACCATTAATGGAGATGGGCTTGGCACACAACATCTTATAATACATCAACAAATGACCGCAACTTATTTCAGGCCCTTTGCATG<br>TTGATGTACCATTAATGGAGATGGGCTTGGCACACAACATCTTATAATACATCAACAAATGACCGCAACTTATTTCAGGCCCTTTGCATG     | 1799<br>1796 |

## LS amino acid sequences alignment

|                        |                                                                                                                                                                                        |            |
|------------------------|----------------------------------------------------------------------------------------------------------------------------------------------------------------------------------------|------------|
| MpLS<br>Unigene0018537 | MALIVFSGAMQWIPSLTLYLPQSHLNSSPKLLSNTKGTSRSLRVSCSSQLTERRSGNYNPSRWVDVFIQTLHSDYKDEKHARRAS<br>MALIVFSGAMQWIPSLTLYLPQSHLNSSPKLLSNTKGTSRSLRVSCSSQLTERRSGNYNPSRWVDVFIQTLHSDYKDEKHARRAS         | 90<br>90   |
| MpLS<br>Unigene0018537 | ELVLVKMELEKETDQIROLELIDDLQRMGLSDHFQNEFKELSSVYLDHYYKNPDPKEERDLYSTSLAFRLREHGQVQAEVYVFGPK<br>ELVLVKMELEKETDQIROLELIDDLQRMGLSDHFQNEFKELSSVYLDHYYKNPDPKEERDLYSTSLAFRLREHGQVQAEVYVFGPK       | 180<br>180 |
| MpLS<br>Unigene0018537 | NESEFKESLSDDTRGLDLYEASFLLTBGETTLESAREEFATKFLERVNEGGDENLLTRIAYSLEIPLHWRIKRPNAPVWIDSYRKRP<br>NESEFKESLSDDTRGLDLYEASFLLTBGETTLESAREEFATKFLERVNEGGDENLLTRIAYSLEIPLHWRIKRPNAPVWIDSYRKRP     | 270<br>269 |
| MpLS<br>Unigene0018537 | NMNPVVLDAIILDNIQVAHRCSELKESFRWRNTGFVEKLFPARDRLVECFWNTGIIIEPRQHASARIMMKVNALITVDDIYDVYGT<br>NMNPVVLDAIILDNIQVAHRCSELKESFRWRNTGFVEKLFPARDRLVECFWNTGIIIEPRQHASARIMMKVNALITVDDIYDVYGT       | 360<br>359 |
| MpLS<br>Unigene0018537 | LEELFETDLIRRWIDSIDQLPDYMQLCFLAINFVLETSYDVMEKEGVNIPVLRQSWVDLADKYMVEARWIFYGGHKPSLEEYLENSW<br>LEELFETDLIRRWIDSIDQLPDYMQLCFLAINFVLETSYDVMEKEGVNIPVLRQSWVDLADKYMVEARWIFYGGHKPSLEEYLENSW     | 450<br>449 |
| MpLS<br>Unigene0018537 | MSISGFCMLTHIFFRVDSFTKETVDSLYKYHDLVRWSSFVLRLADDLGTVEEVSRGVDVPKSLQCYMSDYNAEABARKHKVWKLIAEVW<br>MSISGFCMLTHIFFRVDSFTKETVDSLYKYHDLVRWSSFVLRLADDLGTVEEVSRGVDVPKSLQCYMSDYNAEABARKHKVWKLIAEVW | 540<br>539 |
| MpLS<br>Unigene0018537 | RKMNAERVSKDSPFGKDFIGCAVDLGRMAQLMYHNGDGHGTQHPILIHQQMTALFEFF<br>RKMNAERVSKDSPFGKDFIGCAVDLGRMAQLMYHNGDGHGTQHPILIHQQMTALFEFF                                                               | 598<br>597 |

L3OH nucleotide sequences alignment

|                              |                                                                                                                                                                                        |              |
|------------------------------|----------------------------------------------------------------------------------------------------------------------------------------------------------------------------------------|--------------|
| MpL3OH-PM2<br>Unigene0052571 | ATGGAGCTCCTCCAGCTTTGGTGGCGCTTATAATCCTCGTGTAACTACGTCATATCTCTCTAATCAACCAATGGCGAAAACCGAAA<br>ATGGAGCTCCTCCAGCTTTGGTGGCGCTTATAATCCTCGTGTAACTACGTCATATCTCTCTAATCAACCAATGGCGAAAACCGAAA       | 90<br>90     |
| MpL3OH-PM2<br>Unigene0052571 | CCCCAAGGAAGTTCCCCCGGGCCCGCGAAGCTGCCGTGATCGGGACCTCCACCTCTGTGGGGGAAGCTGCCGAGCACGCGCTG<br>CCCCAAGGAAGTTCCCCCGGGCCCGCGAAGCTGCCGTGATCGGGACCTCCACCTCTGTGGGGGAAGCTGCCGAGCACGCGCTG             | 180<br>180   |
| MpL3OH-PM2<br>Unigene0052571 | GCCAGCGTGGCAAGGAGTACGCGCCCGTGGCCACGTCAGCTGGGTGAGGTGTCTCCGTCGTCCTTTGTGTCGGGAGGGCGACGAAG<br>GCCAGCGTGGCAAGGAGTACGCGCCCGTGGCCACGTCAGCTGGGTGAGGTGTCTCCGTCGTCCTTTGTGTCGGGAGGGCGACGAAG       | 270<br>270   |
| MpL3OH-PM2<br>Unigene0052571 | GAGGCGATGAAGCTGGTACACCGCGGTGGCGAACCCTTCGAGAGCATCGGAGCAGGATCATGTGTGACGACACGAGGACATCATC<br>GAGGCGATGAAGCTGGTACACCGCGGTGGCGAACCCTTCGAGAGCATCGGAGCAGGATCATGTGTGACGACACGAGGACATCATC         | 360<br>360   |
| MpL3OH-PM2<br>Unigene0052571 | TTACAGCCCTACAGCGAGCACTGGCGCCAGATGCGCAAGTCTGGGTCTCCGAGCTCTCTCTCTCCCGCAAGCTCCGCTCTCTCGGCTTC<br>TTACAGCCCTACAGCGAGCACTGGCGCCAGATGCGCAAGTCTGGGTCTCCGAGCTCTCTCTCTCCCGCAAGCTCCGCTCTCTCGGCTTC | 450<br>450   |
| MpL3OH-PM2<br>Unigene0052571 | ATCCGGCAGGACGAGGTCTCCGCTCCTCCGCCACCTCCGCTCTCGGACGGGCGCCGCTGGACATGACGAGGAGATAGAGACGCTG<br>ATCCGGCAGGACGAGGTCTCCGCTCCTCCGCCACCTCCGCTCTCGGACGGGCGCCGCTGGACATGACGAGGAGATAGAGACGCTA         | 540<br>540   |
| MpL3OH-PM2<br>Unigene0052571 | ACGTGCTCCATCATCTCGAGGGCGCGGTTCGGGAGCGTGATCAGGGACAACCGCGAGCTGGTGGGGCTGTCAAGGACCGCTCAGCATG<br>ACGTGCTCCATCATCTCGAGGGCGCGGTTCGGGAGCGTGATCAGGGACAACCGCGAGCTGGTGGGGCTGTCAAGGACCGCTCAGCATG   | 630<br>630   |
| MpL3OH-PM2<br>Unigene0052571 | GCCTCGGGGTTGAGCTCGCGGACATGTTCCTCTCCTCAAGCTCCTCAAGCTCCTGCTGGAACAAGAGCAAGCTCTGGAGGATCGCG<br>GCCTCGGGGTTGAGCTCGCGGACATGTTCCTCTCCTCAAGCTCCTCAAGCTCCTGCTGGAACAAGAGCAAGCTCTGGAGGATCGCG       | 720<br>720   |
| MpL3OH-PM2<br>Unigene0052571 | CGCGCGTTCGACACCATCTCGAGGCCATGTCGACGAGCAACAAGTCAAGAAGAGCGCGGAGTTCCGCGCGCAGGACATCATCGAGCTC<br>CGCGCGTTCGACACCATCTCGAGGCCATGTCGACGAGCAACAAGTCAAGAAGAGCGCGGAGTTCCGCGCGCAGGACATCATCGAGCTC   | 810<br>810   |
| MpL3OH-PM2<br>Unigene0052571 | CTCTTCAGGATGCAAGGACATCCAGATCAAAGTCCCCATCACCACCAACTCCATCAAAGCCTTCATCTTCGAGACCTTCTCAGCAGGG<br>CTCTTCAGGATGCAAGGACATCCAGATCAAAGTCCCCATCACCACCAACTCCATCAAAGCCTTCATCTTCGAGACCTTCTCAGCAGGG   | 900<br>900   |
| MpL3OH-PM2<br>Unigene0052571 | ACTGAGACATCTCAACCAACCACTATGGGTGCTGGCGAGCTGATGAGGAACCGGCACTGATGGCGAAGTGCAGGCGGAGGTGAGA<br>ACTGAGACATCTCAACCAACCACTATGGGTGCTGGCGAGCTGATGAGGAACCGGCACTGATGGCGAAGTGCAGGCGGAGGTGAGA         | 990<br>990   |
| MpL3OH-PM2<br>Unigene0052571 | CGCGCATCTGAAGTGAAGACGAATGGGAGCTGGTACCTGCAAGAGCTTAAATACATGAAATCGGTGGTGAAGGACGATGAGGATG<br>CGCGCATCTGAAGTGAAGACGAATGGGAGCTGGTACCTGCAAGAGCTTAAATACATGAAATCGGTGGTGAAGGACGATGAGGATG         | 1080<br>1080 |
| MpL3OH-PM2<br>Unigene0052571 | CACCTCCGATCCCGTTGATCCCGAGATCATGCAGAGAAGAATGGTGGTTAACGGGTATACGATTCGGAACAAGGCCAGAAATCATGATC<br>CACCTCCGATCCCGTTGATCCCGAGATCATGCAGAGAAGAATGGTGGTTAACGGGTATACGATTCGGAACAAGGCCAGAAATCATGATC | 1170<br>1170 |
| MpL3OH-PM2<br>Unigene0052571 | AACGTCGTGTCATGGCAGGAATCTCTCTACTGGGAAAAACCGGACCTTTTGGCCGAAAGGTTTGACGAGTTTCAAAGGATTTTC<br>AACGTCGTGTCATGGCAGGAATCTCTCTACTGGGAAAAACCGGACCTTTTGGCCGAAAGGTTTGACGAGTTTCAAAGGATTTTC           | 1260<br>1260 |
| MpL3OH-PM2<br>Unigene0052571 | ATGGGAAATGATTTGAGTTCTGTCGGTTCGGAGCGGGAAGAAGATCTGCCCGGCTTGAACCTTCGGGTTGGCAACGTTGAGGTTCCA<br>ATGGGAAATGATTTGAGTTCTGTCGGTTCGGAGCGGGAAGAAGATCTGCCCGGCTTGAACCTTCGGGTTGGCAACGTTGAGGTTCCA     | 1350<br>1350 |
| MpL3OH-PM2<br>Unigene0052571 | TTGGGCGAGCTTCTTTACCACTTCGACTGGAAGTGGCGGAAGCATGGAACCTTCTGATATGACATGTCTGAGCGGAAGGCTTACG<br>TTGGGCGAGCTTCTTTACCACTTCGACTGGAAGTGGCGGAAGCATGGAACCTTCTGATATGACATGTCTGAGCGGAAGGCTTACG         | 1440<br>1440 |
| MpL3OH-PM2<br>Unigene0052571 | GGAATACAAAGAACAACTCTCTCTTGTTCACACACCCCTACGATCTCTGATG<br>GGAATACAAAGAACAACTCTCTCTTGTTCACACACCCCTACGATCTCTGATG                                                                           | 1496<br>1496 |

L3OH amino acid sequences alignment

|                              |                                                                                                                                                                                          |            |
|------------------------------|------------------------------------------------------------------------------------------------------------------------------------------------------------------------------------------|------------|
| MpL3OH-PM2<br>Unigene0052571 | MELLQLWSALITLVVTPISLLINQWRKPKPKCKFPFGPKPLPLIGHLHLWGKLPQHALASVAKEYGPAHVQLGEVPSVWLSREATK<br>MELLQLWSALITLVVTPISLLINQWRKPKPKCKFPFGPKPLPLIGHLHLWGKLPQHALASVAKEYGPAHVQLGEVPSVWLSREATK         | 90<br>90   |
| MpL3OH-PM2<br>Unigene0052571 | EAMKLVDPAKANRFESIGTRIMWYDNEIDIIFSPYSEHWRQMRKICVSELLSSRNVRSPGFIHQDEVSRLLRLRSSAGAAVDMTERIETL<br>EAMKLVDPAKANRFESIGTRIMWYDNEIDIIFSPYSEHWRQMRKICVSELLSSRNVRSPGFIHQDEVSRLLRLRSSAGAAVDMTERIETL | 180<br>180 |
| MpL3OH-PM2<br>Unigene0052571 | TCSITCRAAFGVSIRDNAELVGLVKDALSMASGFEADMPSSKLLNLLCNKSKLWRMRVRVDTILEAIVDEHKKSGEFGGEDIIDV<br>TCSITCRAAFGVSIRDNAELVGLVKDALSMASGFEADMPSSKLLNLLCNKSKLWRMRVRVDTILEAIVDEHKKSGEFGGEDIIDV           | 270<br>270 |
| MpL3OH-PM2<br>Unigene0052571 | LFRMCKLQIKVPIITNSIKAFIFDTPSAGTETSSTTTLWLAEMLMRNPVMAVQAEVRAALKKTNWQVDDVQELKYMKSVMKETMRM<br>LFRMCKLQIKVPIITNSIKAFIFDTPSAGTETSSTTTLWLAEMLMRNPVMAVQAEVRAALKKTNWQVDDVQELKYMKSVMKETMRM         | 360<br>360 |
| MpL3OH-PM2<br>Unigene0052571 | HPPIPLIPRSCREECVNGYTIIPNKARIMINVWSMGRNPLYWEKDTFWPERFTVSKDFMGNDPEFVPPGAGRRIICPLNFGLANVEVF<br>HPPIPLIPRSCREECVNGYTIIPNKARIMINVWSMGRNPLYWEKDTFWPERFTVSKDFMGNDPEFVPPGAGRRIICPLNFGLANVEVF     | 450<br>450 |
| MpL3OH-PM2<br>Unigene0052571 | LAQLLYHFDWKLAEGMKPSNDMMSAEGLTGIRKNNLLLVPTPYDPS<br>LAQLLYHFDWKLAEGMKPSNDMMSAEGLTGIRKNNLLLVPTPYDPS                                                                                         | 497<br>497 |

iPD nucleotide sequences alignment

|                         |                                                                                                                                                                                            |            |
|-------------------------|--------------------------------------------------------------------------------------------------------------------------------------------------------------------------------------------|------------|
| MpiPD<br>Unigene0033747 | ATGGCAACGGTGAAGAAGCTCGCAGGCAAGGTAGCCATCGTAACCGGCGGGCCAGCGGCATCGGGCAGGTACACGGCCGCCCTCTTCGCC<br>ATGGCAACGGTGAAGAAGCTCGCAGGCAAGGTAGCCATCGTAACCGGCGGGCCAGCGGCATCGGGCAGGTACACGGCCGCCCTCTTCGCC   | 90<br>90   |
| MpiPD<br>Unigene0033747 | GAGCGCGCGCCCGCGCGGTGGTGTGATCGCGACATGCAGCCCGAGAAGGGCGGTACCGTGGCGGAATCCATCGCGCGCGCGGTGCAGC<br>GAGCGCGCGCCCGCGCGGTGGTGTGATCGCGACATGCAGCCCGAGAAGGGCGGTACCGTGGCGGAATCCATCGCGCGCGCGGTGCAGC       | 180<br>180 |
| MpiPD<br>Unigene0033747 | TACGTCCACTGCGACATCACCGACGAGCAACAGGTCAAGTCCGTGCTGGATTGGACCGCCGCCACCTACGGCGCGGTGCAGCTGATGTTTC<br>TACGTCCACTGCGACATCACCGACGAGCAACAGGTCAAGTCCGTGCTGGATTGGACCGCCGCCACCTACGGCGCGGTGCAGCTGATGTTTC | 270<br>270 |
| MpiPD<br>Unigene0033747 | TGCACGCTGGCACCGCCAGCGCCACCGCTCAGACCGTCTCTGGACCTGGACCTGGCGCAGTTCGACCGCGTATGCGCTTCAACGCGCGT<br>TGCACGCTGGCACCGCCAGCGCCACCGCTCAGACCGTCTCTGGACCTGGACCTGGCGCAGTTCGACCGCGTATGCGCTTCAACGCGCGT     | 360<br>360 |
| MpiPD<br>Unigene0033747 | GGCACGCGCGCGTGGTGAAGCAGCGCGCGCTAAGATGGTGGAGCTGGGGAGGGCGGCGCTATCATCTGCACCGCCAGCGCGACCGTC<br>GGCACGCGCGCGTGGTGAAGCAGCGCGCGCTAAGATGGTGGAGCTGGGGAGGGCGGCGCTATCATCTGCACCGCCAGCGCGACCGTC         | 450<br>450 |
| MpiPD<br>Unigene0033747 | CAACACGCGCGGCCCAACTTGACGGACTACATCATGTGGAAGTGGGGGTCTGGGGCTGGTGGCGTGGCGAGTTTGCAGCTCGGGGTG<br>CAACACGCGCGGCCCAACTTGACGGACTACATCATGTGGAAGTGGGGGTCTGGGGCTGGTGGCGTGGCGAGTTTGCAGCTCGGGGTG         | 540<br>540 |
| MpiPD<br>Unigene0033747 | CACGGGATTAGGGTTAACAGCGTGTGCGCGACGGCGCTGCGCCACGCGCTCACCGCGACGATCGGGCTCCCGACGGCCCGGATGTGGAG<br>CACGGGATTAGGGTTAACAGCGTGTGCGCGACGGCGCTGCGCCACGCGCTCACCGCGACGATCGGGCTCCCGACGGCCCGGATGTGGAG     | 630<br>630 |
| MpiPD<br>Unigene0033747 | AGCTTCTATGGGCAGGTACCGACCTTGAAAGGGGTGGCGATCACGGCGGAGCACGTGGCGAGGCGGTGGCTTTCTGGCTTCGGATGAG<br>AGCTTCTATGGGCAGGTACCGACCTTGAAAGGGGTGGCGATCACGGCGGAGCACGTGGCGAGGCGGTGGCTTTCTGGCTTCGGATGAG       | 720<br>720 |
| MpiPD<br>Unigene0033747 | GCGGCGTTCGTACCGGCCATGATTGGGGGTGGATGGTGGACTGCAGTGTTTACCAATTGCTGGCGGTGGCCAAAGTG<br>GCGGCGTTCGTACCGGCCATGATTGGGGGTGGATGGTGGACTGCAGTGTTTACCAATTGCTGGCGGTGGCCAAAGTG                             | 797<br>797 |

iPD amino acid sequences alignment

|                         |                                                                                                                                                                                        |            |
|-------------------------|----------------------------------------------------------------------------------------------------------------------------------------------------------------------------------------|------------|
| MpiPD<br>Unigene0033747 | MAIVKKLAGKVAIVTGGASGIGEVITARLFAERGARAVVIADMOPEKGGTVAESIGGRCSYVHCDITDEQVRSVVDWTAATYGGVDVME<br>MAIVKKLAGKVAIVTGGASGIGEVITARLFAERGARAVVIADMOPEKGGTVAESIGGRCSYVHCDITDEQVRSVVDWTAATYGGVDVME | 90<br>90   |
| MpiPD<br>Unigene0033747 | CNAGTASATAQTVLDLDAQPDRVMRVNARGTAACVKQAARKMVELGRGGAIICTASATVHHAGPNLTDYIMSKCGVLGLVRSASLQLGV<br>CNAGTASATAQTVLDLDAQPDRVMRVNARGTAACVKQAARKMVELGRGGAIICTASATVHHAGPNLTDYIMSKCGVLGLVRSASLQLGV | 180<br>180 |
| MpiPD<br>Unigene0033747 | HGIRVNSVSPTALATPLTATIGLRTAADVESFYGVQVTSILKGVAITAEHVAAEVAFLASDEAAAFVTGHDLAVDGGLQCLPFVAVA<br>HGIRVNSVSPTALATPLTATIGLRTAADVESFYGVQVTSILKGVAITAEHVAAEVAFLASDEAAAFVTGHDLAVDGGLQCLPFVAVA     | 264<br>264 |

iPR nucleotide sequences alignment

|                |                                                                                            |     |
|----------------|--------------------------------------------------------------------------------------------|-----|
| MpiPR          | ATGGCAAGTACAGAGGTATGCATTGGTGACGGGAGCAAAAGAGGAATCGGGTTCGAAATCTGCAGGCAGTTG                   | 90  |
| Unigene0033916 | ATGGCAAGTACAGAGGTATGCATTGGTGACGGGAGCAAAAGAGGAATCGGGTTCGAAATCTGCAGGCAGTTG                   | 90  |
| MpiPR          | ATAGTATATTTTAACATGAGAAATGAAAAGAGAGGCTTCGAAGCTCGACAAAGCTGCTGAAGGACTTGAATGTTCTGAAAATCGTTT    | 180 |
| Unigene0033916 | ATAGTATATTTTAACATGAGAAATGAAAAGAGAGGCTTCGAAGCTCGACAAAGCTGCTGAAGGACTTGAATGTTCTGAAAATCGTTT    | 180 |
| MpiPR          | GTTTTTCATCACTGATGTACGATGTAGCTAGCGTTCGCTGTTGGTCTTATCAAATCTAATTCGGAAGCTGATATCTTG             | 270 |
| Unigene0033916 | GTTTTTCATCACTGATGTACGATGTAGCTAGCGTTCGCTGTTGGTCTTATCAAATCTAATTCGGAAGCTGATATCTTG             | 270 |
| MpiPR          | GTGAATATTCAGGAGTTAGCGGATAGAGATGGTTGGAGATGTTTCTGTGTCAAGAGTATATTTAGGCTGACTTCAAAGCCCTTCAA     | 360 |
| Unigene0033916 | GTGAATATTCAGGAGTTAGCGGATAGAGATGGTTGGAGATGTTTCTGTGTCAAGAGTATATTTAGGCTGACTTCAAAGCCCTTCAA     | 360 |
| MpiPR          | GCACCTCGAAGCTGGTGCAAGGAAGAGCGCCCAATTAAAGCCAAAGCAATGGAGAAATGATCGAAAAATTCGAAGGAGCCAAAGATTGC  | 450 |
| Unigene0033916 | GCACCTCGAAGCTGGTGCAAGGAAGAGCGCCCAATTAAAGCCAAAGCAATGGAGAAATGATCGAAAAATTCGAAGGAGCCAAAGATTGC  | 450 |
| MpiPR          | GTTCTTACAAACTACTACGGTCCAAAGAGACTAACACAAGCCCTCATTCCTCTCTTACAACTATCTCCTTCACCGAGAATCGTCAAGCTC | 540 |
| Unigene0033916 | GTTCTTACAAACTACTACGGTCCAAAGAGACTAACACAAGCCCTCATTCCTCTCTTACAACTATCTCCTTCACCGAGAATCGTCAAGCTC | 540 |
| MpiPR          | TCCCTCCTCTTCGGGAGTTTACTTGTCTGTGTGAACGAATGGGCAAGGGAGTCTGGGCGACGAGGATGCTGACGAAGAGAGAGTGC     | 630 |
| Unigene0033916 | TCCCTCCTCTTCGGGAGTTTACTTGTCTGTGTGAACGAATGGGCAAGGGAGTCTGGGCGACGAGGATGCTGACGAAGAGAGAGTGC     | 630 |
| MpiPR          | GAAGAGTCTGGAGGTTTCTTCAAGATATAAAGAGGTTAAGCTTGAAGAAACCAATGGCTCCACATTTTGGGCGGAAAGAGTCT        | 720 |
| Unigene0033916 | GAAGAGTCTGGAGGTTTCTTCAAGATATAAAGAGGTTAAGCTTGAAGAAACCAATGGCTCCACATTTTGGGCGGAAAGAGTCT        | 720 |
| MpiPR          | TGGAAGCGCGCTTGAACGCTTACACTAAGATTCGGCGAAGAAGTACCCGAGTTTCCGCATAAATGCATATGCCCGGTTATGCGAAA     | 810 |
| Unigene0033916 | TGGAAGCGCGCTTGAACGCTTACACTAAGATTCGGCGAAGAAGTACCCGAGTTTCCGCATAAATGCATATGCCCGGTTATGCGAAA     | 810 |
| MpiPR          | ACCGACATTACCTTCCATGCGGGCTGATGAGTGTGCTGGAAGCTGCTCAAGTTCGGGTGAAGCTGGCTCTGCTGCTGATGCGGGGCC    | 900 |
| Unigene0033916 | ACCGACATTACCTTCCATGCGGGCTGATGAGTGTGCTGGAAGCTGCTCAAGTTCGGGTGAAGCTGGCTCTGCTGCTGATGCGGGGCC    | 900 |
| MpiPR          | TCCGGTGTCTTCTCCCTCGAGACAAAGCTTTGSCCTTCTATTATTA                                             | 944 |
| Unigene0033916 | TCCGGTGTCTTCTCCCTCGAGACAAAGCTTTGSCCTTCTATTATTA                                             | 944 |

iPR amino acid sequences alignment

|                |                                                                                           |     |
|----------------|-------------------------------------------------------------------------------------------|-----|
| MpiPR          | MANVORYALVTGANKGIGFEICRQLAEKGIIVILTSNEKRGTAPRRLLLKELNVSARLVPFOLDVITLASVAAVAFIKSRFGKLDIL   | 90  |
| Unigene0033916 | MANVORYALVTGANKGIGFEICRQLAEKGIIVILTSNEKRGTAPRRLLLKELNVSARLVPFOLDVITLASVAAVAFIKSRFGKLDIL   | 90  |
| MpiPR          | VNNAGVSGVMVGDVSVFNEYIEADENALQALEAGAKEEPPFKPRANGEMIEKFEGAKDCVVTNYYGPKRLTQALIPLLQLSPSPRIVNV | 180 |
| Unigene0033916 | VNNAGVSGVMVGDVSVFNEYIEADENALQALEAGAKEEPPFKPRANGEMIEKFEGAKDCVVTNYYGPKRLTQALIPLLQLSPSPRIVNV | 180 |
| MpiPR          | SSSFGSLLLLWNEWAGVLGDEDSUTEERVDEVVEVFLKDIKEGKLEESQWPPHFAAERVSKAALNAYTKIAAKKYPSPFINAICPGYAK | 270 |
| Unigene0033916 | SSSFGSLLLLWNEWAGVLGDEDSUTEERVDEVVEVFLKDIKEGKLEESQWPPHFAAERVSKAALNAYTKIAAKKYPSPFINAICPGYAK | 270 |
| MpiPR          | TDITFHAGPLSVSAAQVPVKLALLPDGGPSGCTFPRDKALAL                                                | 313 |
| Unigene0033916 | TDITFHAGPLSVSAAQVPVKLALLPDGGPSGCTFPRDKALAL                                                | 313 |

## MFS nucleotide sequences alignment

|                         |                                                                                                                                                                                            |              |
|-------------------------|--------------------------------------------------------------------------------------------------------------------------------------------------------------------------------------------|--------------|
| MpMFS<br>Unigene0030907 | ATGGCAGCTCTTCTAGTATTTTCTCTCTCTCTTTAAATCTTCTGGCGTCTCTTTCCATAACGAAAGTCCAGTCTTT...CCTCAAGA<br>ATGGCAGCTCTTCTAGTATTTTCTCTCTCTCTTTAAATCTTCTGGCGTCTCTTTCCATAACGAAAGTCCAGTCTTTCTCTCTCAAGA         | 87<br>90     |
| MpMFS<br>Unigene0030907 | AAGAGGCT...GCGCCGCTCTCCATTAAGGCTTCGGGTGATCGGCCATTTCACACTGATCGGAACCCCTCTCCACCGCTCTCTACCTCC<br>AAGAGGCTGCTGCGCCGCTCTCCATTAAGGCTTCGGGTGATCGGCCATTTCACACTGATCGGAACCCCTCTCCACCGCTCTCTACCTCC     | 174<br>180   |
| MpMFS<br>Unigene0030907 | TTATCCAAAGCGCTACGCGAGGTGATGCTACTCCATTTCGCGAGCGCTCGCTGCTAGTGGCTCTCTCAGCGCGCGCGCGCTGAGATC<br>TTATCCAAAGCGCTACGCGAGGTGATGCTACTCCATTTCGCGAGCGCTCGCTGCTAGTGGCTCTCTCAGCGCGCGCGCGCTGAGATC         | 264<br>270   |
| MpMFS<br>Unigene0030907 | ATGAAGAACAAGACATGATCTTCGCGAGCGAGGCGAGGCTGAGCATCTTCGACAGGCTCTGTACAGCTGCAAGCGCTGGCTTCGCGC<br>ATGAAGAACAAGACATGATCTTCGCGAGCGAGGCGAGGCTGAGCATCTTCGACAGGCTCTGTACAGCTGCAAGCGCTGGCTTCGCGC         | 354<br>360   |
| MpMFS<br>Unigene0030907 | CCCTACCGCGAGCACTGGCGCTACCGCGGAGCATGTGCTGTCTGACAGTCTCTACGCTAAGAGGGTCCAGTGGTTCGCGGATTCGA<br>GCTTACCGCGAGCACTGGCGCTACCGCGGAGCATGTGCTGTCTGACAGTCTCTACGCTAAGAGGGTCCAGTGGTTCGCGGATTCGA           | 444<br>450   |
| MpMFS<br>Unigene0030907 | GAAGAGGAACGTCGGCTATGATTGAGAAGATCAGGCGATCGACGCCACGAGGTCGTGAACCTTGAGCGAGATGTTATGGCGCTGAGC<br>GAAGAGGAACGTCGGCTATGATTGAGAAGATCAGGCGATCGACGCCCT...CGTCTGTGAACCTTGAGCGAGATGTTATGGCGCTGAGC       | 534<br>537   |
| MpMFS<br>Unigene0030907 | AACGCGTAACTTCACAGGCGCGCTGTTAGGCGGAAAGCGACGCGCGGAGATGATTAAATCGGATCTGATTAAGCTTATCAAGCTCTTG<br>AACGCGTAACTTCACAGGCGCGCTGTTAGGCGGAAAGCGACGCGCGGAGATGATTAAATCGGATCTGATTAAGCTTATCAAGCTCTTG       | 624<br>627   |
| MpMFS<br>Unigene0030907 | GGAATTTCAACCTGGGGATTACGTTCCATGGCTCTTTTGGATTAACCGGATTAATGGCGTCTGATCGAGAAGTGGAAAAAGTCTTTAGA<br>GGAATTTCAACCTGGGGATTACGTTCCATGGCTCTTTTGGATTAACCGGATTAATGGCGTCTGATCGAGAAGTGGAAAAAGTCTTTAGA     | 714<br>717   |
| MpMFS<br>Unigene0030907 | AAGTTGGATGGATCATAGAGGGTATTTCTTCGAATAATATAGAAAGGAAGCTGGTCTATGAAACGAATTTCTGAGACAGCTTGCTT<br>AAGTTGGATGGATCATAGAGGGTATTTCTTCGAATAATATAGAAAGGAAGCTGGTCTATGAAACGAATTTCTGAGACAGCTTGCTT           | 804<br>807   |
| MpMFS<br>Unigene0030907 | CAGTTTCAGAGAGAGTAAAGATACTACCCCGTCGAGGATGACGTAATCAAAGCTCTAATCTTCGACATGCTTTTSCCGCGAATCGAT<br>CAGTTTCAGAGAGAGTAAAGATACTACCCCGTCGAGGATGACGTAATCAAAGCTCTAATCTTCGACATGCTTTTSCCGCGAATCGAT         | 894<br>897   |
| MpMFS<br>Unigene0030907 | ACGAGCTTCGCGCTCTAGAGTGGACGATGGCGGAGCTCATAAATAACCGCGTACCCCTAAAAACTTTCGAGAAGCAGGTGCGAGAAGTT<br>ACGAGCTTCGCGCTCTAGAGTGGACGATGGCGGAGCTCATAAATAACCGCGTACCCCTAAAAACTTTCGAGAAGCAGGTGCGAGAAGTT     | 984<br>987   |
| MpMFS<br>Unigene0030907 | TCTAGAAACAAGCTGGGATTACGAGGATGACGTGGACAAGATGCCATCTCTGAAAGCAGTATCCATGAGATTCTACGCTTACATCCA<br>TCTAGAAACAAGCTGGGATTACGAGGATGACGTGGACAAGATGCCATCTCTGAAAGCAGTATCCATGAGATTCTACGCTTACATCCA         | 1074<br>1077 |
| MpMFS<br>Unigene0030907 | CTTTTCGCAATCTGCTCCCTTCGAGAATTGACTCAAGACGCCAATATGCTCGGCTACGACATCCCACTGGCACCTCTGTTGTTGGTCAAC<br>CTTTTCGCAATCTGCTCCCTTCGAGAATTGACTCAAGACGCCAATATGCTCGGCTACGACATCCCACTGGCACCTCTGTTGTTGGTCAAC   | 1164<br>1167 |
| MpMFS<br>Unigene0030907 | AACTGGGCGATATCGAGAGACCCCTCGTTGTGGGAAAAATCCCGAAGAATTTCGTCAGAAAGGTTCTCTCGAGACGAGCATAGACTATAAA<br>AACTGGGCGATATCGAGAGACCCCTCGTTGTGGGAAAAATCCCGAAGAATTTCGTCAGAAAGGTTCTCTCGAGACGAGCATAGACTATAAA | 1254<br>1257 |
| MpMFS<br>Unigene0030907 | GGCTTCGATTTTGAGATGCTTCCGTTCCGGTCCGGTCCGAAGAGGTCGCCCGGATTCACAGTTTTCGATGCTTTTATACGAGCTTGCACTA<br>GGCTTCGATTTTGAGATGCTTCCGTTCCGGTCCGGTCCGAAGAGGTCGCCCGGATTCACAGTTTTCGATGCTTTTATACGAGCTTGCACTA | 1344<br>1347 |
| MpMFS<br>Unigene0030907 | TCCAGCTCTTAAACGAGTTGATTTTGAGATTGGTAAATGGAGATAGAGCGAGGATTTGGACATGACTGAAGCTCTCGATTTTGTAGTC<br>TCCAGCTCTTAAACGAGTTGATTTTGAGATTGGTAAATGGAGATAGAGCGAGGATTTGGACATGACTGAAGCTCTCGATTTTGTAGTC       | 1434<br>1411 |
| MpMFS<br>Unigene0030907 | CATAAGAAGTCTCCCTTGCTTTGCTGTGCTACTCCACGCTCAATCTTG<br>.....                                                                                                                                  | 1481<br>1411 |

## MFS amino acid sequences alignment

|                         |                                                                                                                                                                                          |            |
|-------------------------|------------------------------------------------------------------------------------------------------------------------------------------------------------------------------------------|------------|
| MpMFS<br>Unigene0030907 | MAALLVFFPSLLILLAVLFHKRSSSS...RMRPPSHRLPVIGHHLICSLHRSFTSLSKRYGEVMLLHFGSAPVLVASSAAAAAREI<br>MAALLVFFPSLLILLAVLFHKRSSSLIPSRKRPPSHRLPVIGHHLICSLHRSFTSLSKRYGEVMLLHFGSAPVLVASSAAAAAREI         | 88<br>90   |
| MpMFS<br>Unigene0030907 | MKNQDIFASRPRLSIDRLVYSGKVAFAPYGEHWRARSMCVLQLLSAKRVQSFRRIREETSAMIEKIRRSMTIVNLSEMFMAIT<br>MKNQDIFASRPRLSIDRLVYSGKVAFAPYGEHWRARSMCVLQLLSAKRVQSFRRIREETSAMIEKIRRSMTIVNLSEMFMAIT               | 178<br>179 |
| MpMFS<br>Unigene0030907 | NGVHRAALGRKDCGGDDENRDLRVIMLLGSFNVGDYVPWLSWINRINGVDAEVEKVGKLDSEEGILRKYRRKVGDDENFVDTL<br>NGVHRAALGRKDCGGDSEMTLNRDLRVIMLLGSFNVGDYVPWLSWINRINGVDAEVEKVGKLDSEEGILRKYRRKVGDDENFVDTL            | 268<br>269 |
| MpMFS<br>Unigene0030907 | QFQRESKDTLPVEDDVIKALILNVPAGCTDTTSVLEWTMAELINRPRTLKTLQNEVREVS RNKGGITEDDVDMKPYLKAVSMPIILRLH<br>QFQRESKDTLPVEDDVIKALILNVPAGCTDTTSVLEWTMAELINRPRTLKTLQNEVREVS RNKGGITEDDVDMKPYLKAVSMPIILRLH | 358<br>359 |
| MpMFS<br>Unigene0030907 | PFALLPRELTQDANMLGYDPRGTVLVNNWAISRDPSSLWENPEEPRPERFLETSIDYKGMHPEMLPFGSGRRGCPGTFAMSLVELAL<br>PFALLPRELTQDANMLGYDPRGTVLVNNWAISRDPSSLWENPEEPRPERFLETSIDYKGMHPEMLPFGSGRRGCPGTFAMSLVELAL       | 448<br>449 |
| MpMFS<br>Unigene0030907 | SKLVNEFDRLANGDRVEDLI...<br>SKLVNEFDRLANGDRVEDLI.....                                                                                                                                     | 492<br>470 |

PR nucleotide sequences alignment

|                |                                                                                              |      |
|----------------|----------------------------------------------------------------------------------------------|------|
| MpPR           | ATGGTGATGAACAAGCAAAATTGTACTCAACAACACTACGCTTAAGGGTTCCTAAAGCAATCCGACTTCGGTTGAGAACTTCCACGATCTGC | 90   |
| Unigene0047772 | ATGGTGATGAACAAGCAAAATTGTACTCAACAACACTACGCTTAAGGGTTCCTAAAGCAATCCGACTTCGGTTGAGAACTTCCACGATCTGC | 90   |
| MpPR           | ATGGAGATCCCATATGGCTGCAACGGTGCCGTTTGGTCAAGAACTTGTAAGTTCGCTCAATCCTTATCTCATCTCTCGCATGGGAAAA     | 180  |
| Unigene0047772 | ATGGAGATCCCATATGGCTGCAACGGTGCCGTTTGGTCAAGAACTTGTAAGTTCGCTCAATCCTTATCTCATCTCTCGCATGGGAAAA     | 180  |
| MpPR           | CTCGATATCCCAAGTCTTGATTCACCTTCCTCGCTCTACTATGTTAGCTATGGAGTGTCAAAAGTATTGGATTGACGCATCCGAGT       | 270  |
| Unigene0047772 | CTCGATATCCCAAGTCTTGATTCACCTTCCTCGCTCTACTATGTTAGCTATGGAGTGTCAAAAGTATTGGATTGACGCATCCGAGT       | 270  |
| MpPR           | TACGAGAAGGCGAACTGATTTGGGGTCACAAGCTGGATGGGAGGAATATACCTTATCCAAAATCCATATAATTGTTTAAATCCAA        | 360  |
| Unigene0047772 | TACGAGAAGGCGAACTGATTTGGGGTCACAAGCTGGATGGGAGGAATATACCTTATCCAAAATCCATATAATTGTTTAAATCCAA        | 360  |
| MpPR           | GACAAAAGATGTGCTTTATCTACTATGTTGGGATCTAGGAATGCCTGGGATGACAGCATATGCAGGATTTTTTGAGATTTCCTCTCCG     | 450  |
| Unigene0047772 | GACAAAAGATGTGCTTTATCTACTATGTTGGGATCTAGGAATGCCTGGGATGACAGCATATGCAGGATTTTTTGAGATTTCCTCTCCG     | 450  |
| MpPR           | AAAAAAGCGAAACTGTGTTTGTAAACGGCTGCAGCAGGATCTGTGGCCAGCTTGTGGTCAGTTTGCAAGATGTTTGGTTCGTATGTT      | 540  |
| Unigene0047772 | AAAAAAGCGAAACTGTGTTTGTAAACGGCTGCAGCAGGATCTGTGGCCAGCTTGTGGTCAGTTTGCAAGATGTTTGGTTCGTATGTT      | 540  |
| MpPR           | GTTGGAATGCCGGGACAAAGAGAAGTTGATCTTTTGAAGAACAAATTTGGTTCGATGATGCATTTAATTATAAAGAGAGATGAT         | 630  |
| Unigene0047772 | GTTGGAATGCCGGGACAAAGAGAAGTTGATCTTTTGAAGAACAAATTTGGTTCGATGATGCATTTAATTATAAAGAGAGATGAT         | 630  |
| MpPR           | TATGATATGCTTTTGAAGAGGCACCTTCCCGAAGGAATGATATATACTTCGATATGTTGGAGGGAAGATGCTTGAAGCTGTGATCAAC     | 720  |
| Unigene0047772 | TATGATATGCTTTTGAAGAGGCACCTTCCCGAAGGAATGATATATACTTCGATATGTTGGAGGGAAGATGCTTGAAGCTGTGATCAAC     | 720  |
| MpPR           | AACATGAGAGTCCACGGCCGCATCGCGGTATGTGGGATGCTCTCCAGTAAAGCCTGAAGCAGCCGAAGCGCTCCACAACCTTGCTTAAAG   | 810  |
| Unigene0047772 | AACATGAGAGTCCACGGCCGCATCGCGGTATGTGGGATGCTCTCCAGTAAAGCCTGAAGCAGCCGAAGCGCTCCACAACCTTGCTTAAAG   | 810  |
| MpPR           | CTAAATCCCAAGCAAAATTCGTATGCAAGGGTTTGTGTTGTTGATTACTATCATCTCTACCCAAAGTTCCTTGAGATGGTTCGCGCGCC    | 900  |
| Unigene0047772 | CTAAATCCCAAGCAAAATTCGTATGCAAGGGTTTGTGTTGTTGATTACTATCATCTCTACCCAAAGTTCCTTGAGATGGTTCGCGCGCC    | 900  |
| MpPR           | ATCAAGGAGGAAAAGTGAATACGTGGAAGACATATCTGAAGGCCCTTGAGAGCGCCCTAGCCTCTCTTGGGGGTGATGTCGGTTCGT      | 990  |
| Unigene0047772 | ATCAAGGAGGAAAAGTGAATACGTGGAAGACATATCTGAAGGCCCTTGAGAGCGCCCTAGCCTCTCTTGGGGGTGATGTCGGTTCGT      | 990  |
| MpPR           | AACCTTGGCAATCAATGTTGTTGCCGTTTCTCGGAGTA                                                       | 1028 |
| Unigene0047772 | AACCTTGGCAATCAATGTTGTTGCCGTTTCTCGGAGTA                                                       | 1028 |

PR amino acid sequences alignment

|                |                                                                                              |     |
|----------------|----------------------------------------------------------------------------------------------|-----|
| MpPR           | MVMNKQIVLNNYVNGSLKESDLALRTSTICMEIFEGCNGAHLVKNLYLSVNPYLILRMGKLDIPOFDSILPGSTIVSYGVSKVLDSHPS    | 90  |
| Unigene0047772 | MVMNKQIVLNNYVNGSLKESDLALRTSTICMEIFEGCNGAHLVKNLYLSVNPYLILRMGKLDIPOFDSILPGSTIVSYGVSKVLDSHPS    | 90  |
| MpPR           | YEKGELIWGSQAGWEEYTLIQNPYNLFKIQDKDVPLSYVVGILLMPGMTAYAGFFEICSPKKGETVFVTTAAAGSVGQLVGQFAKMFQCYV  | 180 |
| Unigene0047772 | YEKGELIWGSQAGWEEYTLIQNPYNLFKIQDKDVPLSYVVGILLMPGMTAYAGFFEICSPKKGETVFVTTAAAGSVGQLVGQFAKMFQCYV  | 180 |
| MpPR           | VGSAGSKEKVDLLKNKFGFDDAFNYKBEESDYDTALKRHPFBGIDIFYDNVGGKMLEAVINNMRVHGR IAVCGMV SQYSLKQPEGVHNLK | 270 |
| Unigene0047772 | VGSAGSKEKVDLLKNKFGFDDAFNYKBEESDYDTALKRHPFBGIDIFYDNVGGKMLEAVINNMRVHGR IAVCGMV SQYSLKQPEGVHNLK | 270 |
| MpPR           | LPKQIRMQGFVVVDYVHLYPKFLEWVLPKIKBGKVTIVEDISBGLSAPSALLGVVGRNHCNQVVAVSR                         | 341 |
| Unigene0047772 | LPKQIRMQGFVVVDYVHLYPKFLEWVLPKIKBGKVTIVEDISBGLSAPSALLGVVGRNHCNQVVAVSR                         | 341 |

MR nucleotide sequences alignment

|                        |                                                                                                                                                                                              |            |
|------------------------|----------------------------------------------------------------------------------------------------------------------------------------------------------------------------------------------|------------|
| MpMR<br>Unigene0041050 | ATGGCAGATACCTTTACGCAAGGTATGCTTTCCTTACCGTGC AAAACAAAGGAATCGGGTTCGAGATATCGAGGCAGTTAGCTTCGAAA<br>ATGGCAGATACCTTTACGCAAGGTATGCTTTCCTTACCGTGC AAAACAAAGGAATCGGGTTCGAGATATCGAGGCAGTTAGCTTCGAAA     | 90<br>90   |
| MpMR<br>Unigene0041050 | GGAAATGAAGGTGATTTTAGCTTCAAGAAACGAGAAGAGAGGCATCGAAGCTCGAGAAAGGCTACTTAAGGATCGAGATCAATTTCTGAT<br>GGAAATGAAGGTGATTTTAGCTTCAAGAAACGAGAAGAGAGGCATCGAAGCTCGAGAAAGGCTACTTAAGGATCGAGATCAATTTCTGAT     | 180<br>180 |
| MpMR<br>Unigene0041050 | GACGATGTGTTTTTCATCAACTGATGTGCTGACCCCTGCTAGGCGCTGTGCTGTGCTCAGTTCATCGAAACCAAAATCGGGAGGCTT<br>GACGATGTGTTTTTCATCAACTGATGTGCTGACCCCTGCTAGGCGCTGTGCTGTGCTCAGTTCATCGAAACCAAAATCGGGAGGCTT           | 270<br>270 |
| MpMR<br>Unigene0041050 | GATATTCGTGTAATAATCGCGGATTTACTGGAGTAGCGATAGAGGGAGATATTTCAGTGTATCAAGAGTGTCTGAGGCAAAACATTATT<br>GATATTCGTGTAATAATCGCGGATTTACTGGAGTAGCGATAGAGGGAGATATTTCAGTGTATCAAGAGTGTCTGAGGCAAAACATTATT       | 360<br>360 |
| MpMR<br>Unigene0041050 | GCAGCTCAGCGTGGACAGGCATCCATTCCATCCCAAACTACTGGTAGGCTCATTTGACACATTGGAGGGTTCAAAAGAGTGTATAGAA<br>GCAGCTCAGCGTGGACAGGCATCCATTCCATCCCAAACTACTGGTAGGCTCATTTGACACATTGGAGGGTTCAAAAGAGTGTATAGAA         | 450<br>450 |
| MpMR<br>Unigene0041050 | ACAAACTACTATGGCAAAAAGAATAACAGAAACCCCTAATTCCTCTCCTGCAAAAATCTGATTCCCAACAATTGTCAATGTCTCTCTCC<br>ACAAACTACTATGGCAAAAAGAATAACAGAAACCCCTAATTCCTCTCCTGCAAAAATCTGATTCCCAACAATTGTCAATGTCTCTCTCC       | 540<br>540 |
| MpMR<br>Unigene0041050 | ACCTCTCTGACTTTACTGCTCCAGCCTAATGAATGGC AAAAGGAGTCTTTAGCAGCA ..... CAGCTGAATGAAGCAAGGTGGAG<br>ACCTCTCTGACTTTACTGCTCCAGCCTAATGAATGGC AAAAGGAGTCTTTAGCAGCTGAGACACACACTGAATGAAGCAAGGTGGAG         | 624<br>630 |
| MpMR<br>Unigene0041050 | GAAGTTTTCATGAATTCTCAAGGATTTCATGATGTTAAATGCAACAAAACCACTGGCTCTCTAACCTTGCAGCCTACAAAAGTATCG<br>GAAGTTTTCATGAATTCTCAAGGATTTCATGATGTTAAATGCAACAAAACCACTGGCTCTCTAACCTTGCAGCCTACAAAAGTATCG           | 714<br>720 |
| MpMR<br>Unigene0041050 | AAAGCTCGCTGTTAATGCTATACCTCGGATCATAGCGCGAAAGTACCCGAGTTTCTGCATAAATTCAGTGTGCTCTGGTTTGTGTAGAACAA<br>AAAGCTCGCTGTTAATGCTATACCTCGGATCATAGCGCGAAAGTACCCGAGTTTCTGCATAAATTCAGTGTGCTCTGGTTTGTGTAGAACAA | 804<br>810 |
| MpMR<br>Unigene0041050 | GATATTGTCTACAATCTTGGAGTACTAAGTGAAGCTGAAGGTGCTGAAGCTCCGGTGAAGCTGGCTTTTGTGCCCATGGCGGGCCCTCG<br>GATATTGTCTACAATCTTGGAGTACTAAGTGAAGCTGAAGGTGCTGAAGCTCCGGTGAAGCTGGCTTTTGTGCCCATGGCGGGCCCTCG       | 894<br>900 |
| MpMR<br>Unigene0041050 | GGCTCCTTCTCTCTCGAGAGGAAGCCTTGTCTTGTACTIA<br>GGCTCCTTCTCTCTCGAGAGGAAGCCTTGTCTTGTACTIA                                                                                                         | 935<br>941 |

MR amino acid sequences alignment

|                        |                                                                                                                                                                                      |            |
|------------------------|--------------------------------------------------------------------------------------------------------------------------------------------------------------------------------------|------------|
| MpMR<br>Unigene0041050 | MADTFTORVALITGANKGIGFEICRQLASKGMKVILASRNEKRGTEARERLLKESRSISDDDVPHOLDVDPASAVAVAHFIETKFGRL<br>MADTFTORVALITGANKGIGFEICRQLASKGMKVILASRNEKRGTEARERLLKESRSISDDDVPHOLDVDPASAVAVAHFIETKFGRL | 90<br>90   |
| MpMR<br>Unigene0041050 | DILVNNAGFTGVAIEGDISVYQCEANIIAACGGAPPHPTSGRLIETLEGSKECIETNYYGTRITETLLIPLLKSDSPTIVNVSS<br>DILVNNAGFTGVAIEGDISVYQCEANIIAACGGAPPHPTSGRLIETLEGSKECIETNYYGTRITETLLIPLLKSDSPTIVNVSS         | 180<br>180 |
| MpMR<br>Unigene0041050 | TFSTILLQPNENAKGVFSSSLNLSKVVEVLHEHMDPIDGKLQQNHWPPIAAKYVSKAAVNAYTRIARKYPSFCINSVCPGEVRT<br>TFSTILLQPNENAKGVFSSMDSLNLSKVVEVLHEHMDPIDGKLQQNHWPPIAAKYVSKAAVNAYTRIARKYPSFCINSVCPGEVRT       | 268<br>270 |
| MpMR<br>Unigene0041050 | DICYNLGVLSAEGAEAPVKLALLPNSGPGSGFTSREALS<br>DICYNLGVLSAEGAEAPVKLALLPNSGPGSGFTSREALS                                                                                                   | 310<br>312 |

Supplementary Figure 6 Alignment of nucleotide and amino acid sequences of 9 menthol biosynthetic genes from *M. piperita* and *M. canadensis*.
