# Supplementary material for: Transcriptome Analysis of JA Signal Transduction, Transcription Factors, and Monoterpene Biosynthesis Pathway in Response to Methyl Jasmonate Elicitation in Mentha canadensis L
Source: MDPI journal article supplement (doi:10.3390/ijms19082364), 2018-08-10
Supplement: s1 [file s1]

**A**

|                            |                                                                                                                                                            |            |
|----------------------------|------------------------------------------------------------------------------------------------------------------------------------------------------------|------------|
| MsYABBY5<br>Unigene0062650 | ATGGATATGGCTGACGAGCTGTGTTACNTTCCTTGCAGCTACTGCAATATTATTCCTTGGGTAAAGTGTTCATCG<br>ATGGATATGGCTGACGAGCTGTGTTACNTTCCTTGCAGCTACTGCAANTTTATTCCTTGGGTAAAGTGTTCATCG | 75<br>75   |
| MsYABBY5<br>Unigene0062650 | AGCAGCTTGTGTTGATGAGTACAGTTAGGTGTGGGCACTGCGCCAACTTTTGGACTGTGAATATGGCTGCTGCC<br>AGCAGCTTGTGTTGATGAGTACAGTTAGGTGTGGGCACTGCGCCAACTTTTGGACTGTGAATATGGCTGCTGCC   | 150<br>150 |
| MsYABBY5<br>Unigene0062650 | TTCCCTCTCTGACGAGCTCTCTCTTCCAAGATCTTCATCAACATCACCATCAGGGTCTTAGCTACGCTCCATCG<br>TTCCCTCTCTGACGAGCTCTCTCTTCCAAGATCTTCATCAACATCACCATCAGGGTCTTAGCTACGCTCCATCG   | 225<br>225 |
| MsYABBY5<br>Unigene0062650 | GATTACAGAGTCGACCTCGGCTCTCTTCCAAATGGAACCTACAGGATGCCAATCGAGCTCTAGCTTCATCAAC<br>GATTACAGAGTCGACCTCGGCTCTCTTCCAAATGGAACCTACAGGATGCCAATCGAGCTCTAGCTTCATCAAC     | 300<br>300 |
| MsYABBY5<br>Unigene0062650 | AAACGAGATCAGAGAATCATCAATCGTCCCTCGAGAAGCGGCGAGTGTTCATCTGCATACAATCAGTTCATT<br>AAACGAGATCAGAGAATCATCAATCGTCCCTCGAGAAGCGGCGAGTGTTCATCTGCATACAATCAGTTCATT       | 375<br>375 |
| MsYABBY5<br>Unigene0062650 | AAGGAGGAATTCAGAGAATCAAGGCCAACAACTCTGATATCAGCCATAGGGAAGCTTCAGCACTGCTGCCAAA<br>AAGGAGGAATTCAGAGAATCAAGGCCAACAACTCTGATATCAGCCATAGGGAAGCTTCAGCACTGCTGCCAAA     | 450<br>450 |
| MsYABBY5<br>Unigene0062650 | AATTGGGCACACTTTTCTCATATCCATTTTGGGCTCATGCTGGAGAGCAAGAACCAGATAATAAACTTGAGGAG<br>AATTGGGCACACTTTTCTCATATCCATTTTGGGCTCATGCTGGAGAGCAAGAACCAGATAATAAACTTGAGGAG   | 525<br>525 |
| MsYABBY5<br>Unigene0062650 | SATTCTGAGAAGCATCAATGAGAAGGCGAGCCGTTCTGAACAAAATG<br>SATTCTGAGAAGCATCAATGAGAAGGCGAGCCGTTCTGAACAAAATG                                                         | 572<br>572 |

**B**

|                            |                                                                                                                                                                |            |
|----------------------------|----------------------------------------------------------------------------------------------------------------------------------------------------------------|------------|
| MsYABBY5<br>Unigene0062650 | MDMAEQLCYIPCSYCNIIILAVSVPCSSLFDDVTVRCHCANLWTVNMAAAPPSSLHASSFQDLHHHHQCFSYAPS<br>MDMAEQLCYIPCSYCNIIILAVSVPCSSLFDDVTVRCHCANLWTVNMAAAPPSSLHASSFQDLHHHHQCFSYAPS     | 75<br>75   |
| MsYABBY5<br>Unigene0062650 | DYRVDLGSSSKWNYRMFMPQPPSFINKPDQRIINRPPEKQRQVPQSAYNQFIKEEIQRIKANNPDISHREAFSTAAK<br>DYRVDLGSSSKWNYRMFMPQPPSFINKPDQRIINRPPEKQRQVPQSAYNQFIKEEIQRIKANNPDISHREAFSTAAK | 150<br>150 |
| MsYABBY5<br>Unigene0062650 | NWAHFPPIHFGLMLBSNQDNKLEEDSEKHQMRRAAVLN<br>NWAHFPPIHFGLMLBSNQDNKLEEDSEKHQMRRAAVLN                                                                               | 189<br>189 |

**C**

|                         |                                                                                                                                                                  |            |
|-------------------------|------------------------------------------------------------------------------------------------------------------------------------------------------------------|------------|
| MsMYB<br>Unigene0030793 | ATGGGAAGAGCGCCGTGCTGTGAGAAAGTTGGGTTGAAGAGAGGGAGATGGACTGCAGAAGAAGATGAAAGCTTC<br>ATGGGAAGAGCGCCGTGCTGTGAGAAAGTTGGGTTGAAGAGAGGGAGATGGACTGCAGAAGAAGATGAAAGCTTC       | 75<br>75   |
| MsMYB<br>Unigene0030793 | AGAAAAATATATTACGAAAAATGGTGAAGGCTGCTGGCGATCATTCGCCAAGAATCGAGGTTTACTTAGATGTGGA<br>AGAAAAATATATTACGAAAAATGGTGAAGGCTGCTGGCGATCATTCGCCAAGAATCGAGGTTTACTTAGATGTGGA     | 150<br>150 |
| MsMYB<br>Unigene0030793 | AAGAGTTCGAGACTGAGATGGATTAAATTTTGGAGATCATGATGTGAAGAGAGGGAATATTTCTCTCAAGAAGAA<br>AAGAGTTCGAGACTGAGATGGATTAAATTTTGGAGATCATGATGTGAAGAGAGGGAATATTTCTCTCAAGAAGAA       | 225<br>225 |
| MsMYB<br>Unigene0030793 | GAAATCATCATTAATCTCCATGCATCTATGGGCAACAGGTGGTCCCTGATCGCCGCGCACTTGCCGGGTAGAACAA<br>GAAATCATCATTAATCTCCATGCATCTATGGGCAACAGGTGGTCCCTGATCGCCGCGCACTTGCCGGGTAGAACAA     | 300<br>300 |
| MsMYB<br>Unigene0030793 | GACAAATGAAATCAAAAATTAAGGAACTCCCATTTGAGAGAGAAATTCACGGTTTCCGCC...CTAATCCACAG<br>GACAAATGAAATCAAAAATTAAGGAACTCCCATTTGAGAGAGAAATTCACGGTTTCCGCCSCCTAATCCACAG          | 372<br>375 |
| MsMYB<br>Unigene0030793 | TTTCATTCGCGCGCGCGCTCCGCTCCGCTCTCTCCAGCCCAAGAGCAAGAACAGCAATAAAGAGGCAAG<br>TTTCATTCGCGCGCGCGCTCCGCTCCGCTCTCTCCAGCCCAAGAGCAAGAACAGCAATAAAGAGGCAAG                   | 447<br>450 |
| MsMYB<br>Unigene0030793 | SCGGCAGCTAAAACGCCACTGCGCGCTGCTCATGCGGACTACCCCACTCCGGAGAAAGATCCTCGTGGGC<br>SCGGCAGCTAAAACGCCACTGCGCGCTGCTCATGCGGACTACCCCACTCCGGAGAAAGATCCTCGTGGGC                 | 522<br>525 |
| MsMYB<br>Unigene0030793 | AGACCTGGGAAGGAGAGCAAGAGTGAAGCGAGAGAGCGGAGCTCCATGGTGGGAGAGTGGACGATTTAAC<br>AGACCTGGGAAGGAGAGCAAGAGTGAAGCGAGAGAGCGGAGCTCCATGGTGGGAGAGTGGACGATTTAAC                 | 597<br>600 |
| MsMYB<br>Unigene0030793 | ATGACGAGAGACTTGACGCGCTCTGCGGCCCCACACTGGACTTCGAGACCGGAAGTCAAAATTTCCGATCCGCGT<br>ATGACGAGAGACTTGACGCGCTCTGCGGCCCCACACTGGACTTCGAGACCGGAAGTCAAAATTTCCGATCCGCGT       | 672<br>675 |
| MsMYB<br>Unigene0030793 | CTGGGCAGCTAGATAACTCGTCTGCAAAATTAAGAGAACGCTTTCTGGATTGTGACGACGAGGACGAC<br>CTGGGCAGCTAGATAACTCGTCTGCAAAATTAAGAGAACGCTTTCTGGATTGTGACGACGAGGACGAC                     | 747<br>750 |
| MsMYB<br>Unigene0030793 | AAGTGAATTCACACGTGGCAACGGAGAAATGGATGGTGCATGCTTCTTGGTGTGTGTCATG<br>AAGTGAATTCACACGTGGCAACGGAGAAATGGATGGTGCATGCTTCTTGGTGTGTGTCATG                                   | 812<br>815 |
| MsMYB<br>Unigene0030793 | MGRAPCCEKVLKGRWTAEEDEKLKRYIQENGEGCWRSLPKNAGLLRCGSKRLRWINYLRSDVKRGNISSQBE<br>MGRAPCCEKVLKGRWTAEEDEKLKRYIQENGEGCWRSLPKNAGLLRCGSKRLRWINYLRSDVKRGNISSQBE             | 75<br>75   |
| MsMYB<br>Unigene0030793 | EIIINLHASMGNRWSLIAHLPGRTDNEIKNYWNSHLRSKFHGF...FNPQFI PPPPPPP...PSSKPKTKNSNKKAK<br>EIIINLHASMGNRWSLIAHLPGRTDNEIKNYWNSHLRSKFHGF...FNPQFI PPPPPPP...PSSKPKTKNSNKKAK | 149<br>150 |
| MsMYB<br>Unigene0030793 | AAAKTATAAVVMPTTPTPEKESSVGRPGKRESEARESGSSMVGELDDLNTEDLSGLWGPTLDFGTGSEISDPG<br>AAAKTATAAVVMPTTPTPEKESSVGRPGKRESEARESGSSMVGELDDLNTEDLSGLWGPTLDFGTGSEISDPG           | 224<br>225 |
| MsMYB<br>Unigene0030793 | LGQLNSSLQIYETLSWINDEDDKWNNSVANGEMDGAMLSWLI<br>LGQLNSSLQIYETLSWINDEDDKWNNSVANGEMDGAMLSWLI                                                                         | 269<br>270 |

**D**

**Supplementary Figure 7 Alignment of nucleotide and amino acid sequences of MsYABBY5 and MsMYB with their homologs in *M. canadensis*.** A, B: nucleotides and amino acid sequences of MsYABBY5 and Unigene0062650; C, D: nucleotides and amino acid sequences of MsMYB and Unigene0030793.
