# Supplementary figures and images for: Transcriptome Analysis of JA Signal Transduction, Transcription Factors, and Monoterpene Biosynthesis Pathway in Response to Methyl Jasmonate Elicitation in Mentha canadensis L
Source: MDPI journal article supplement (doi:10.3390/ijms19082364), 2018-08-10

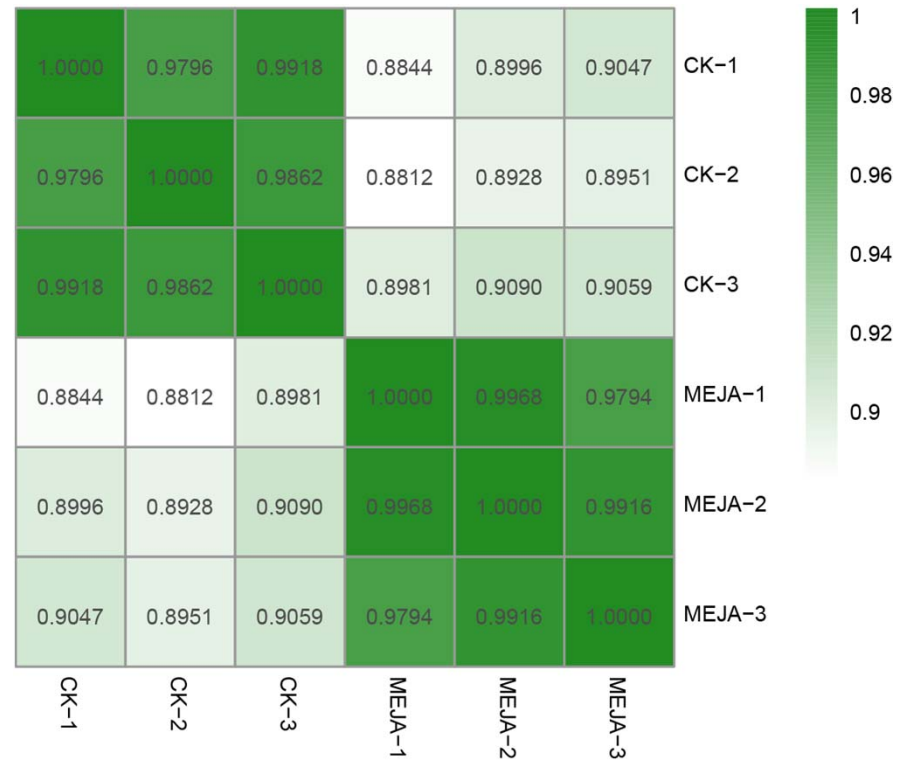

**Supplementary Figure 5 The pearson correlation between samples in RNA-seq.**

Supplement: s1 [file s1]

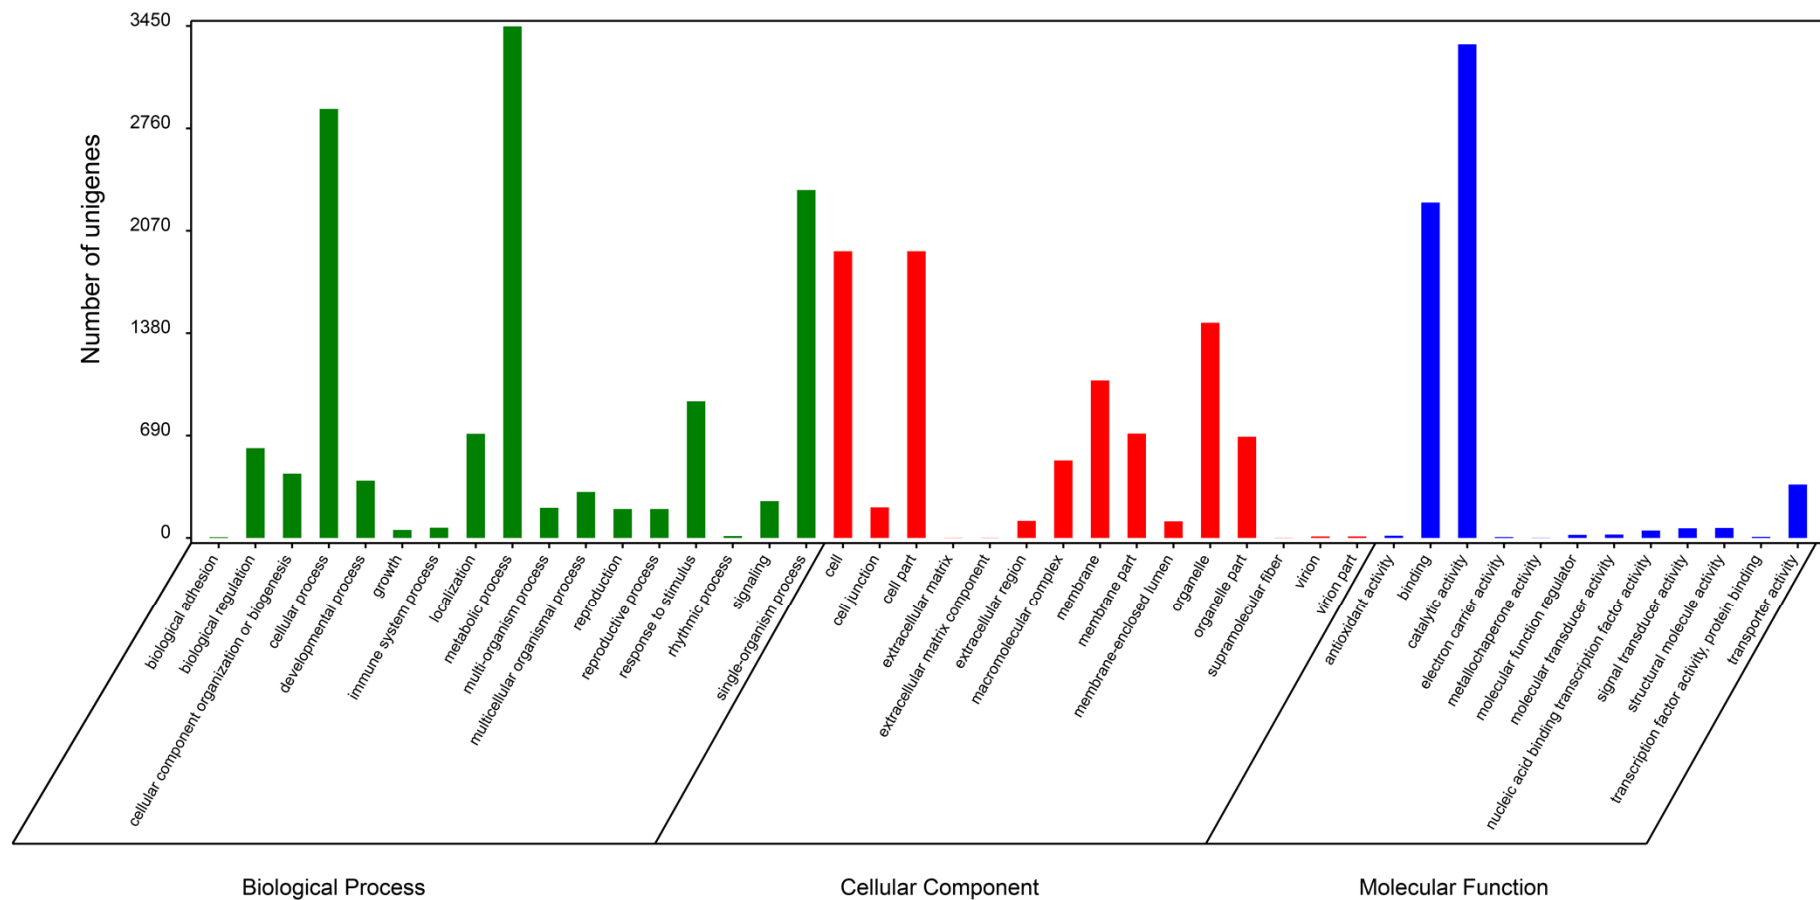

**Supplementary Figure 2 Gene ontology (GO) annotation of assembled unigenes.**

Supplement: s1 [file s1]

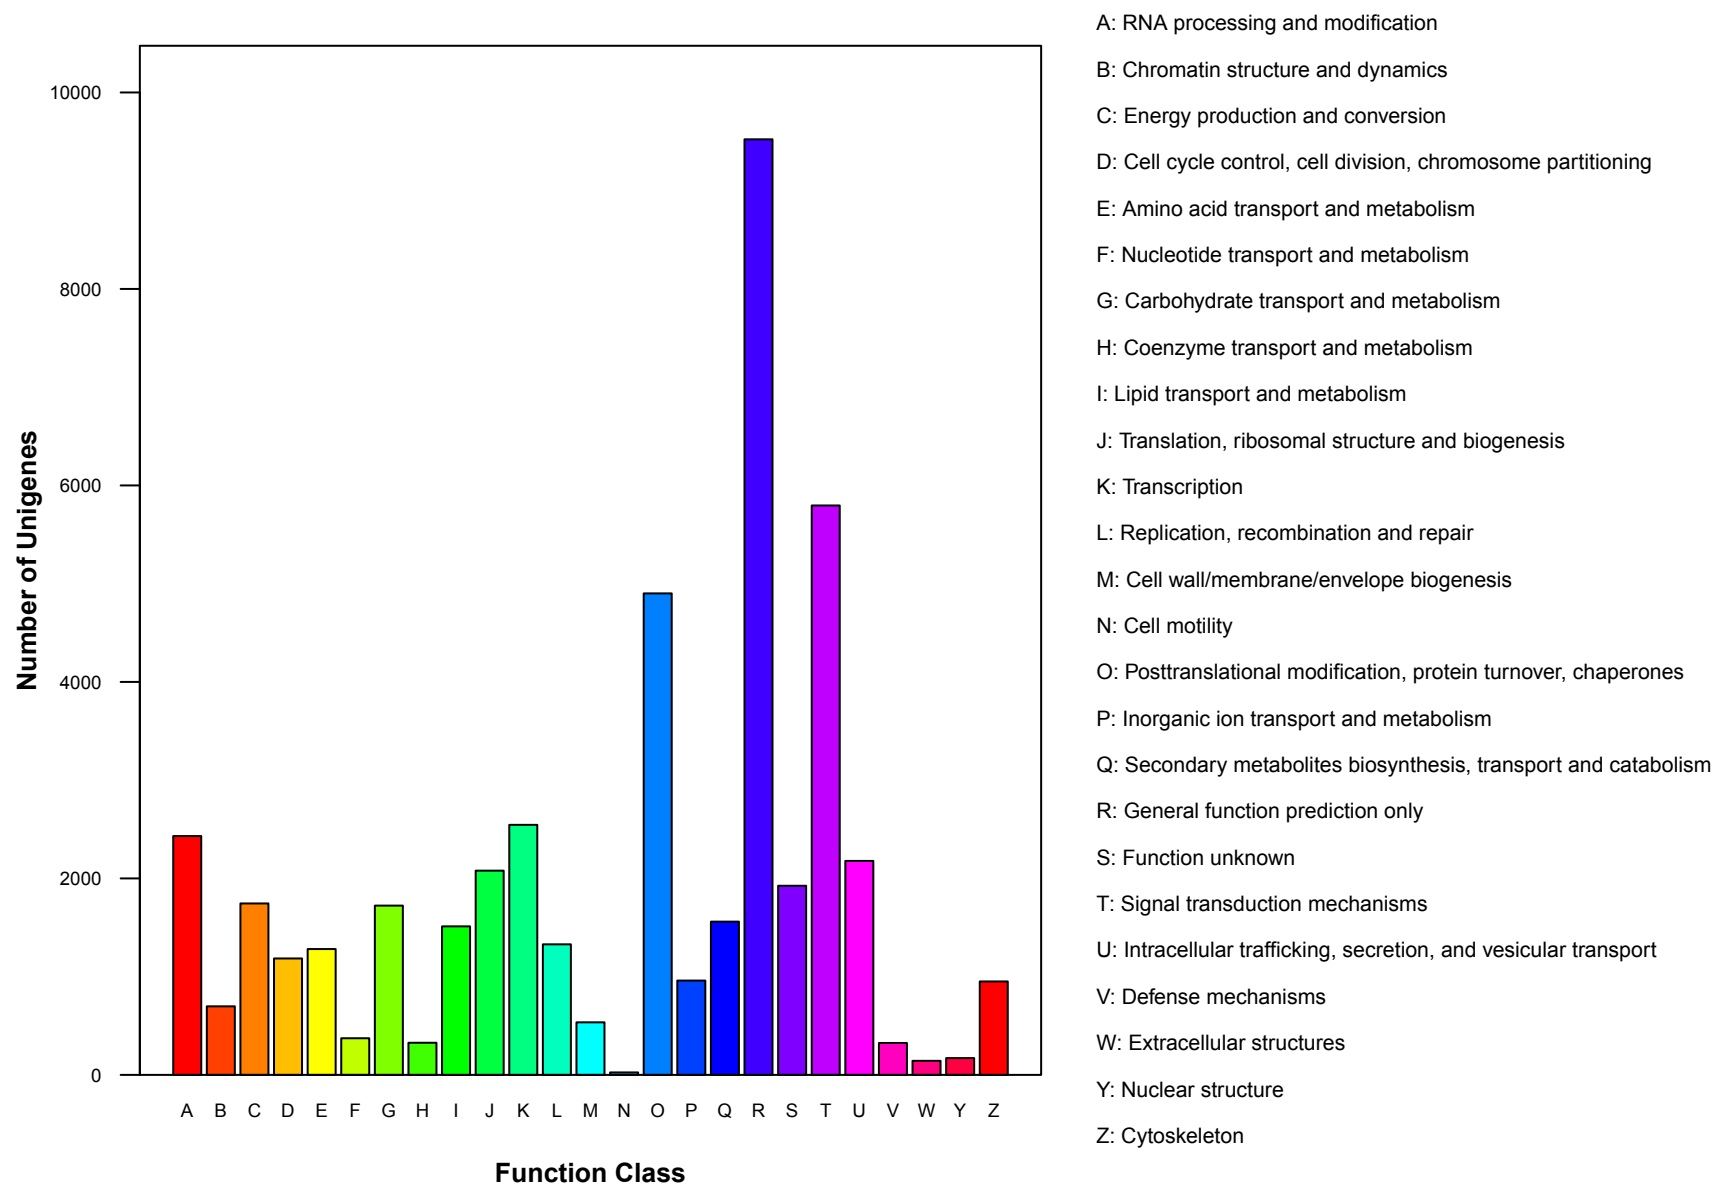

Supplementary Figure 3 KOG functional classification of assembled unigenes.

Supplement: s1 [file s1]

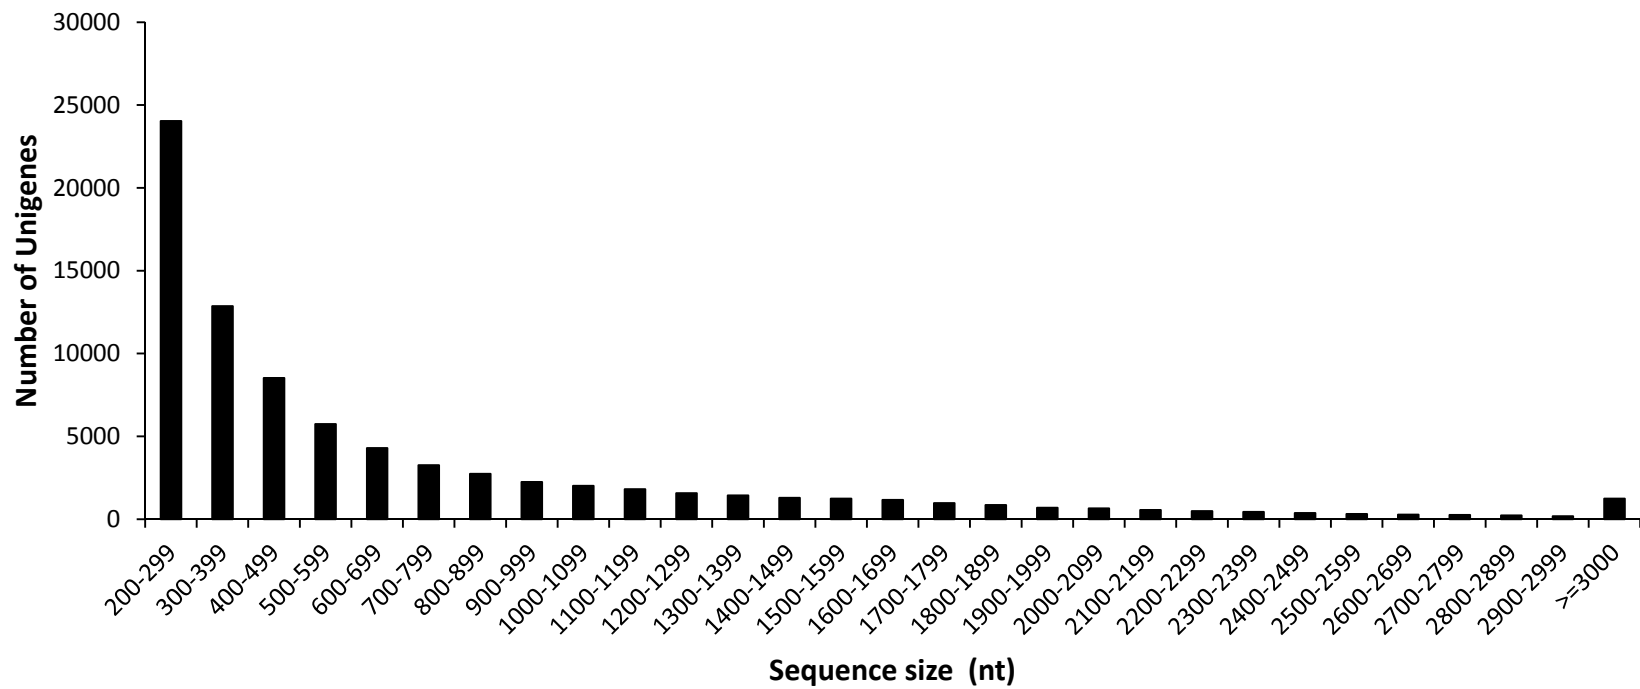

**Supplementary Figure 1 Length distribution of assembled unigenes.**

Supplement: s1 [file s1]
